# Supplementary material for: Single-cell transcriptomic-informed deconvolution of bulk data identifies immune checkpoint blockade resistance in urothelial cancer
Source: PubMed Central journal article supplement — iScience. 2024 May 7;27(6):109928. doi: 10.1016/j.isci.2024.109928 (PMC11133924; doi:10.1016/j.isci.2024.109928), 2024-05-07
Supplement: mmc1.pdf [file mmc1.pdf]

iScience, Volume 27

## **Supplemental information**

### **Single-cell transcriptomic-informed deconvolution of bulk data identifies immune checkpoint blockade resistance in urothelial cancer**

**Li Wang, Sudeh Izadmehr, John P. Sfakianos, Michelle Tran, Kristin G. Beaumont, Rachel Brody, Carlos Cordon-Cardo, Amir Horowitz, Robert Sebra, William K. Oh, Nina Bhardwaj, Matthew D. Galsky, and Jun Zhu**

**A**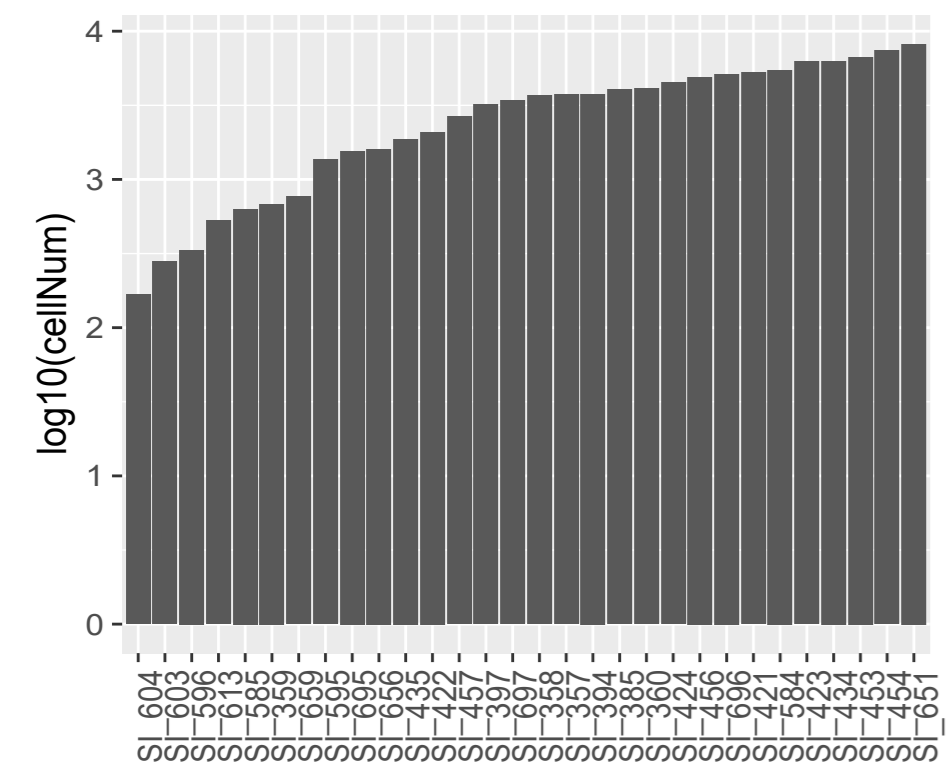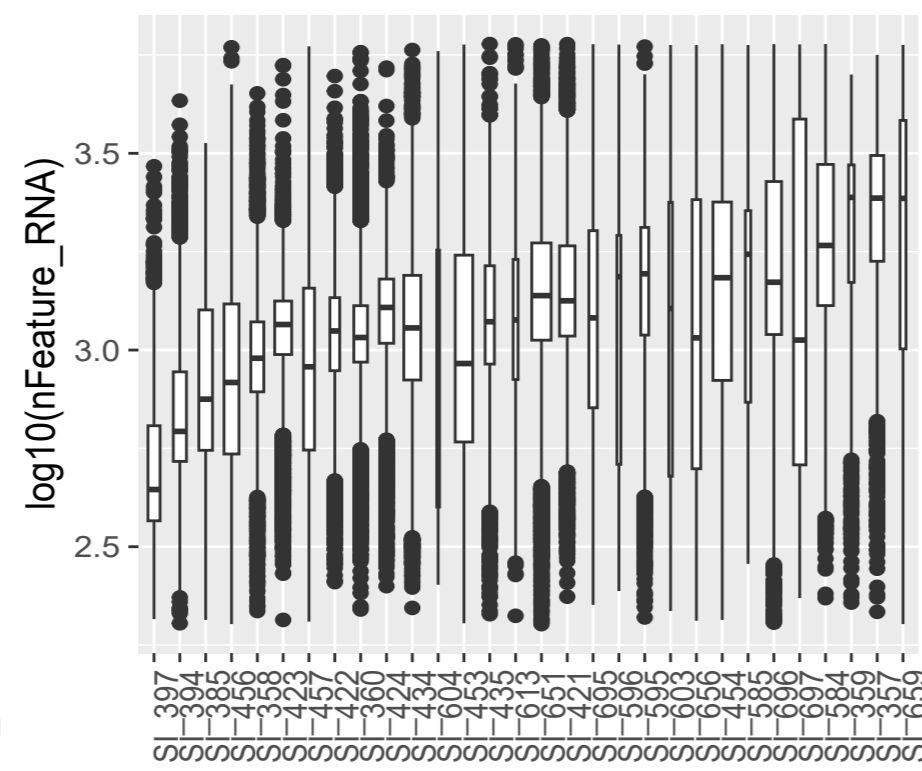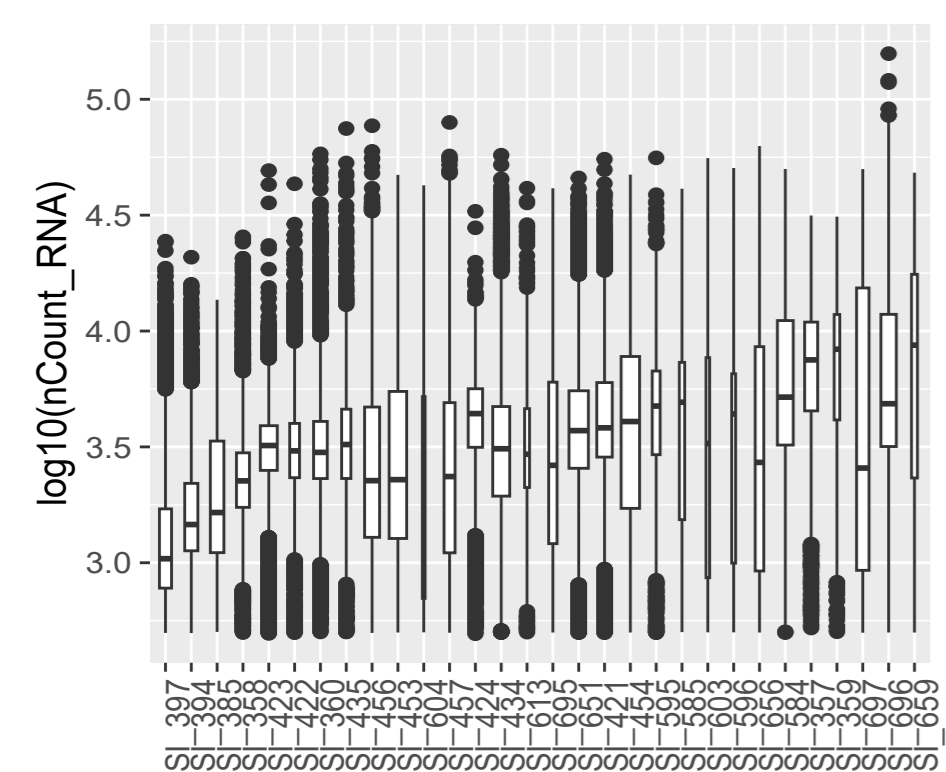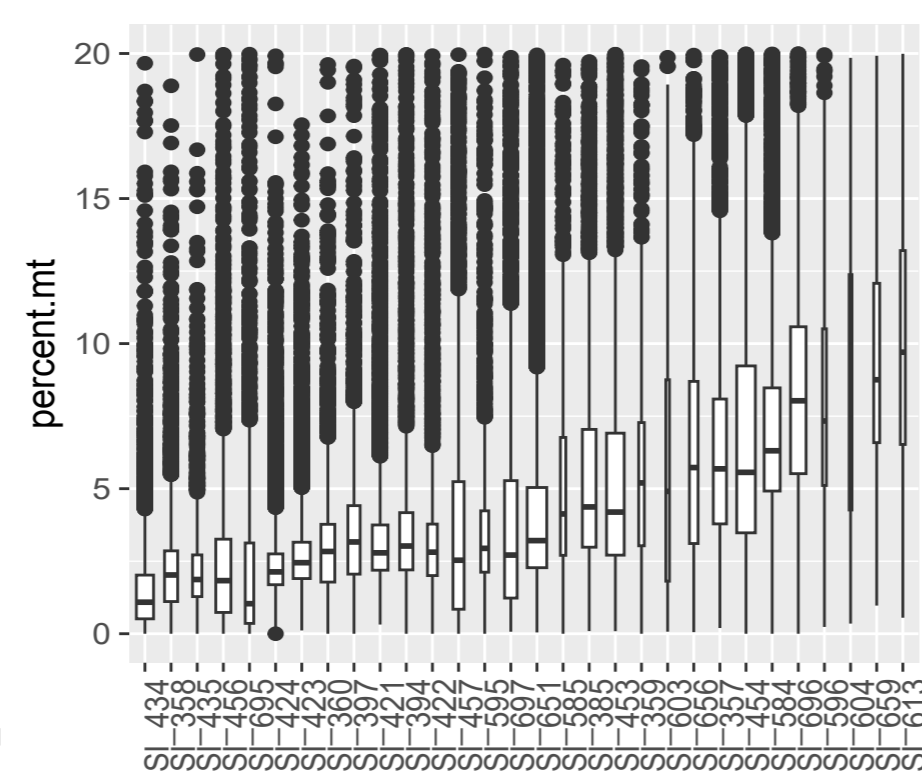**B**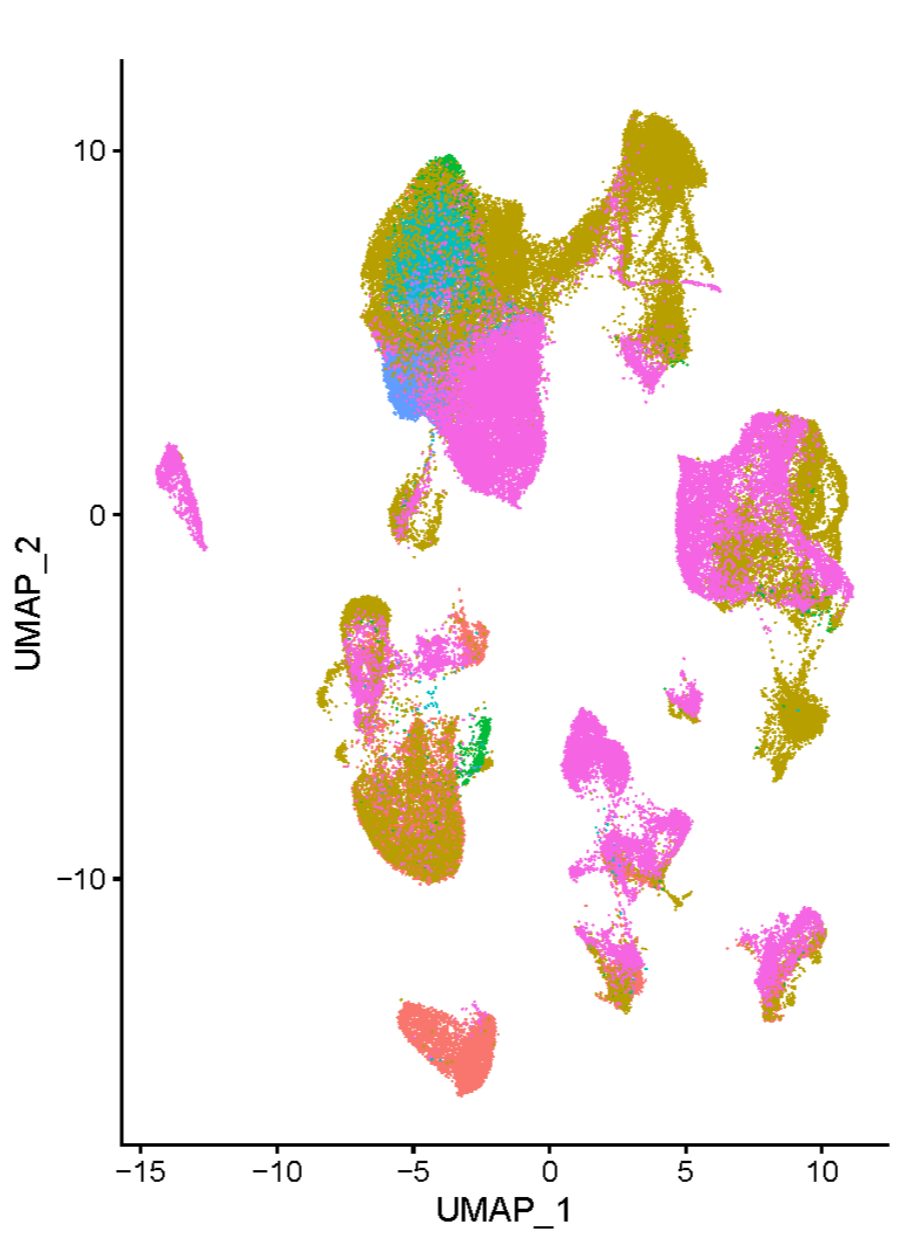**C**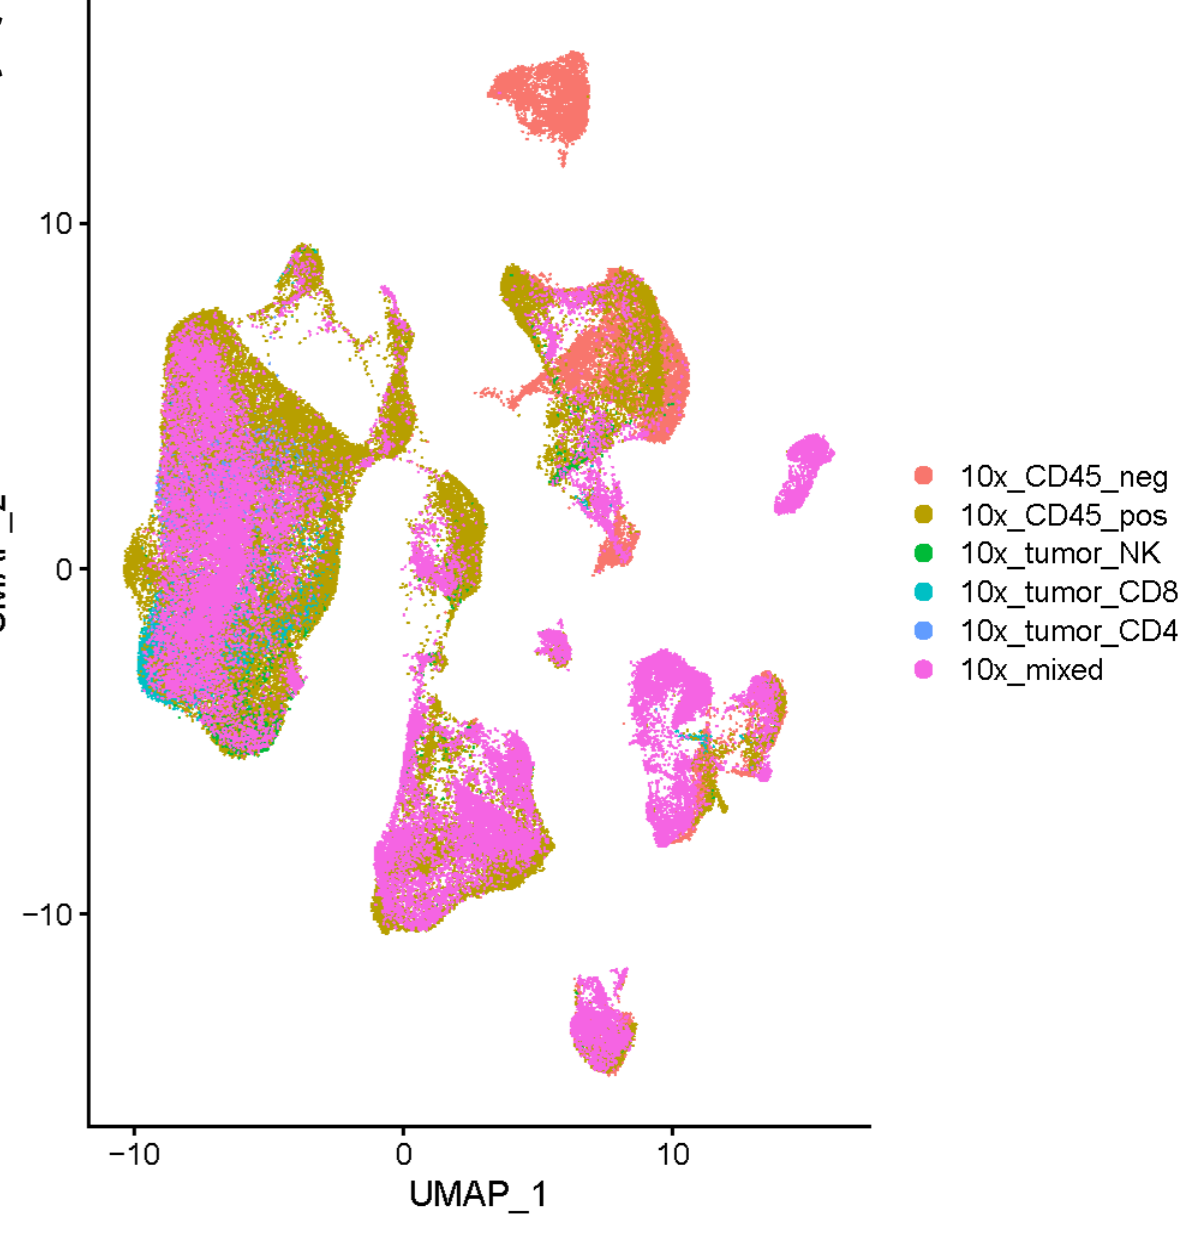**D**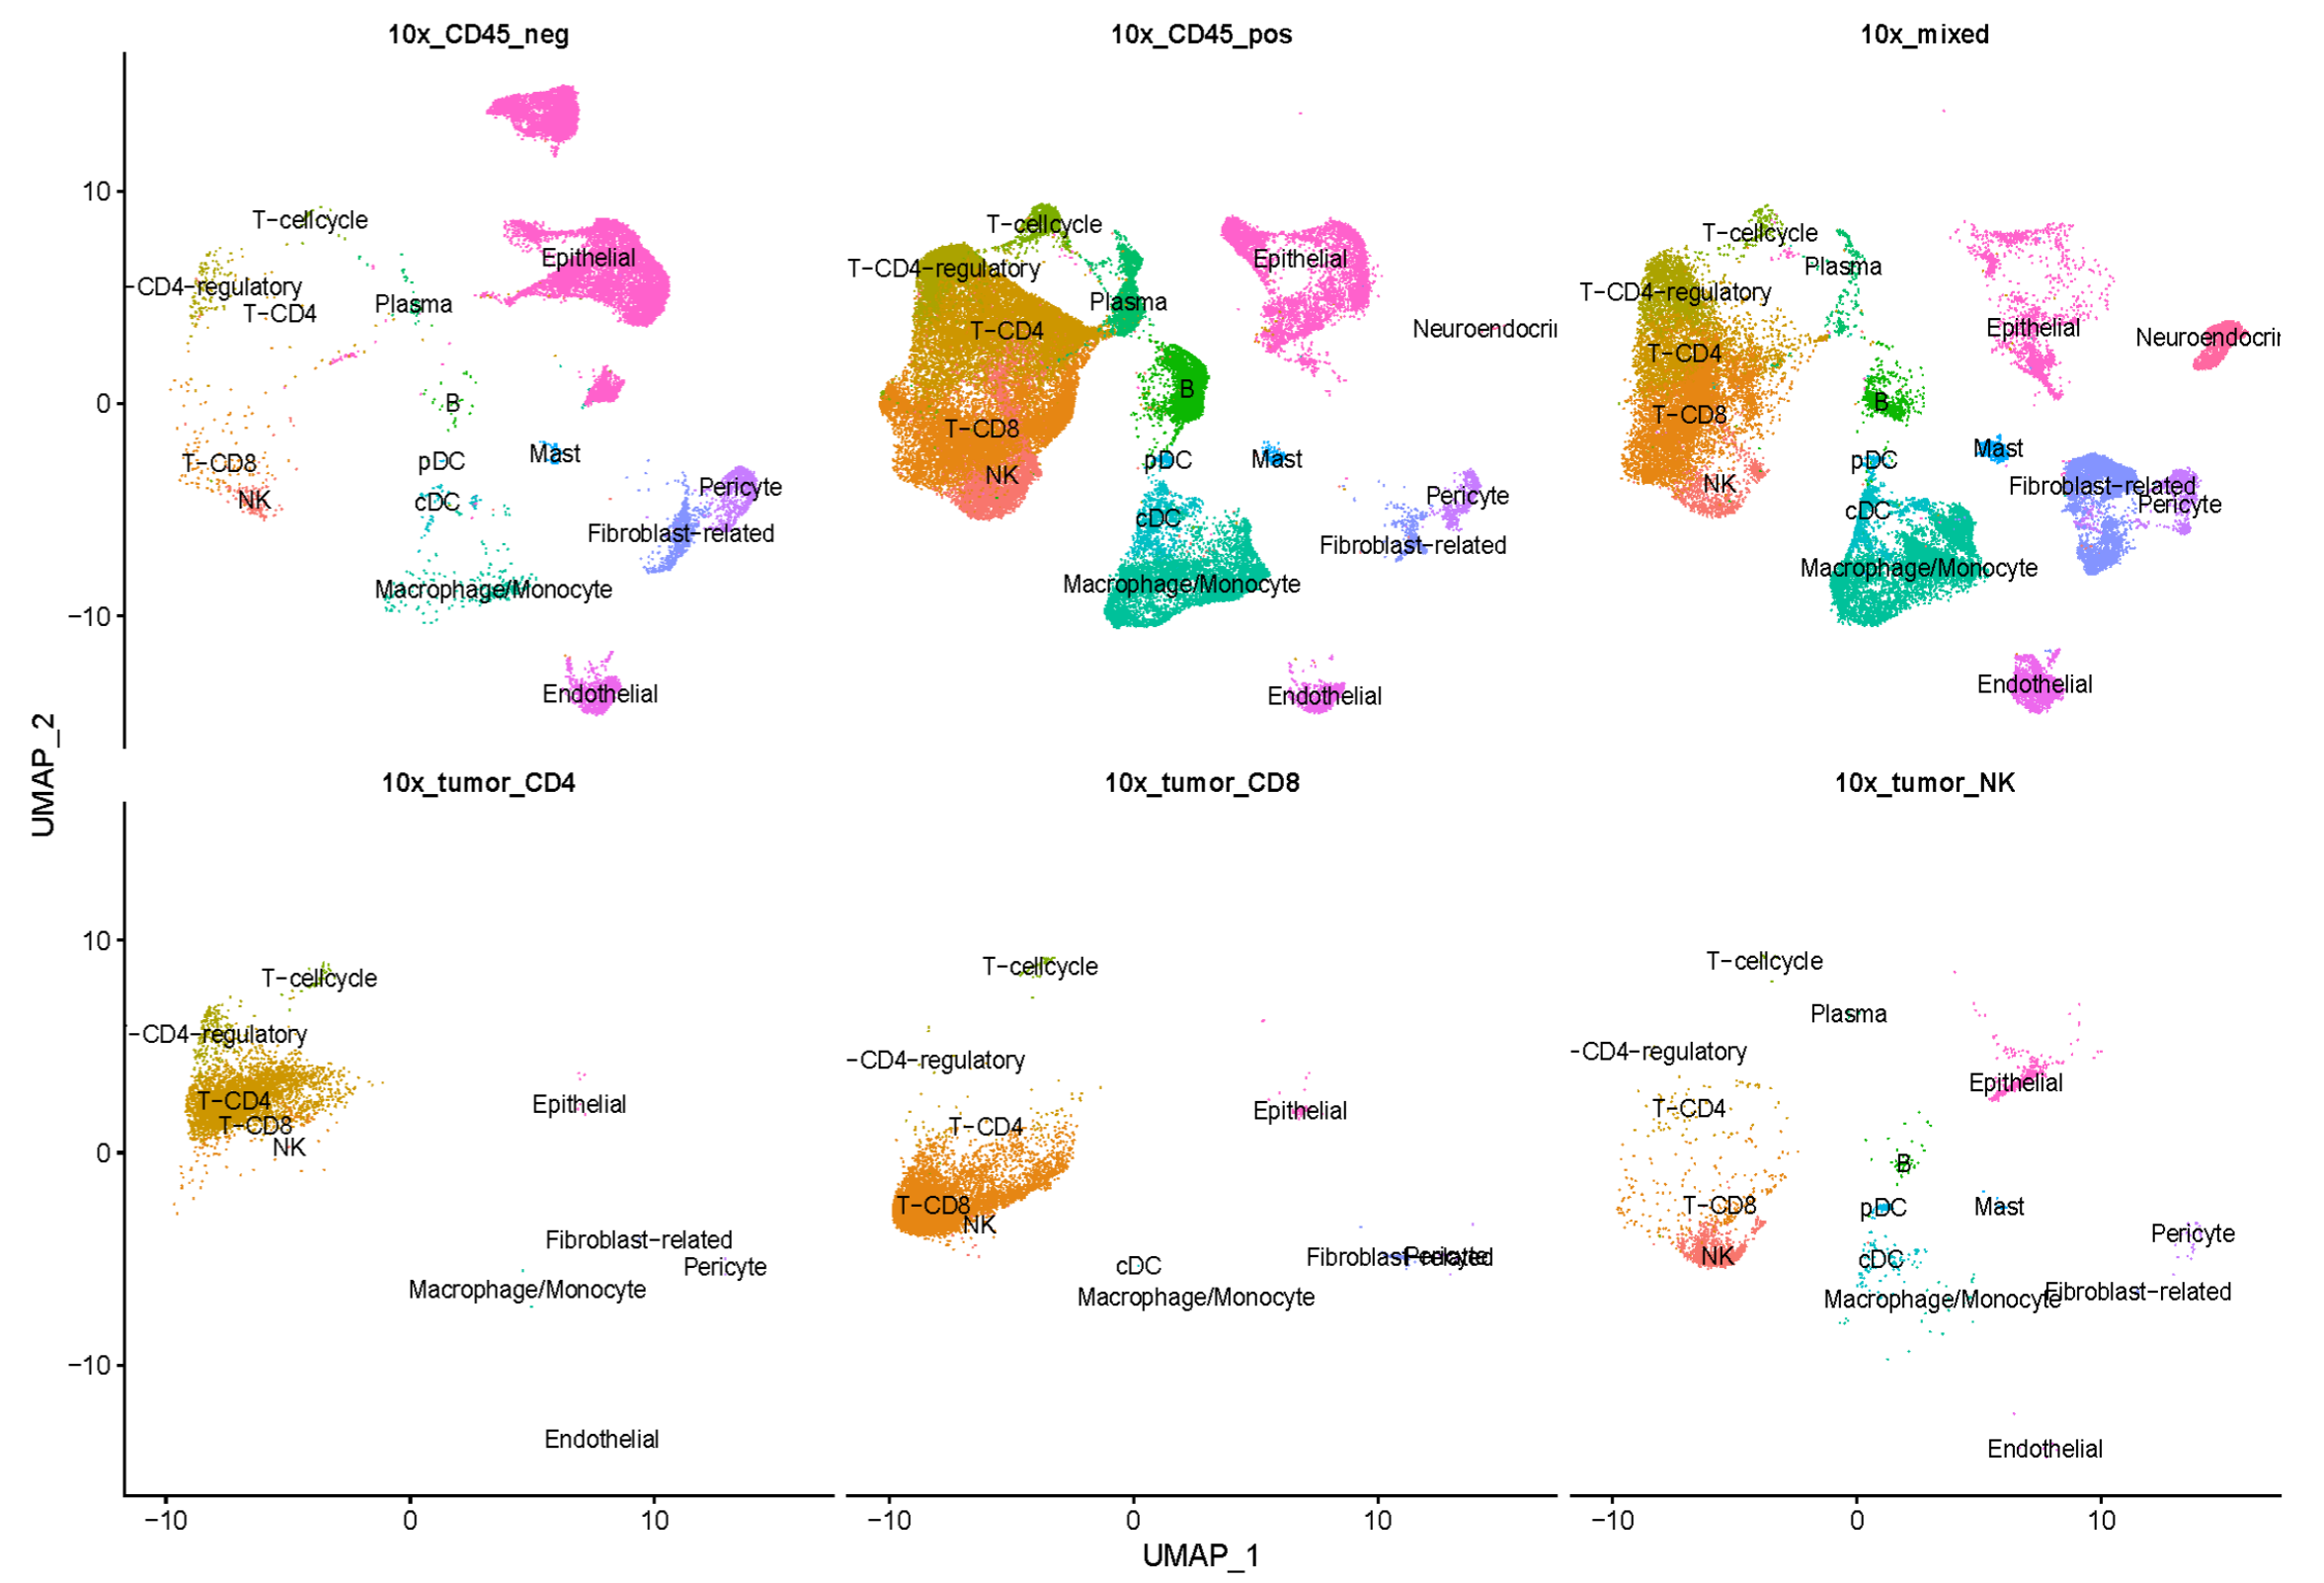

Figure S1

### A Evaluation by reconstituted bulk RNAseq

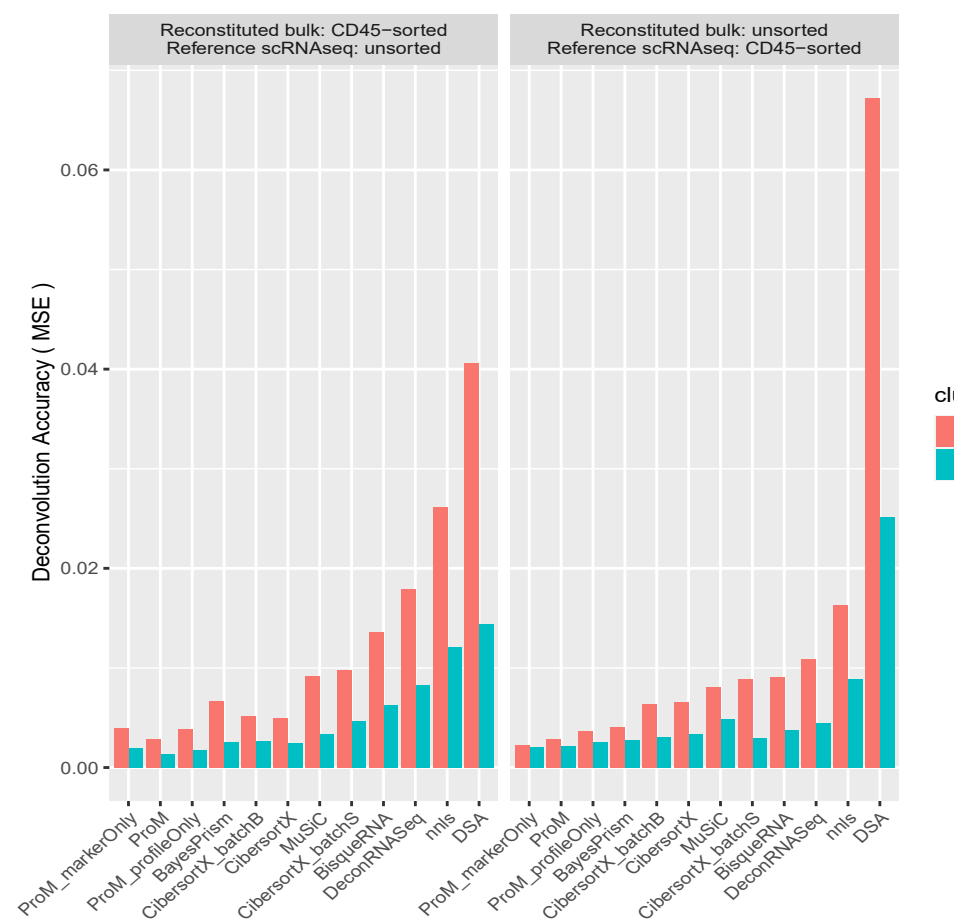

### B Evaluation of different marker selection strategies

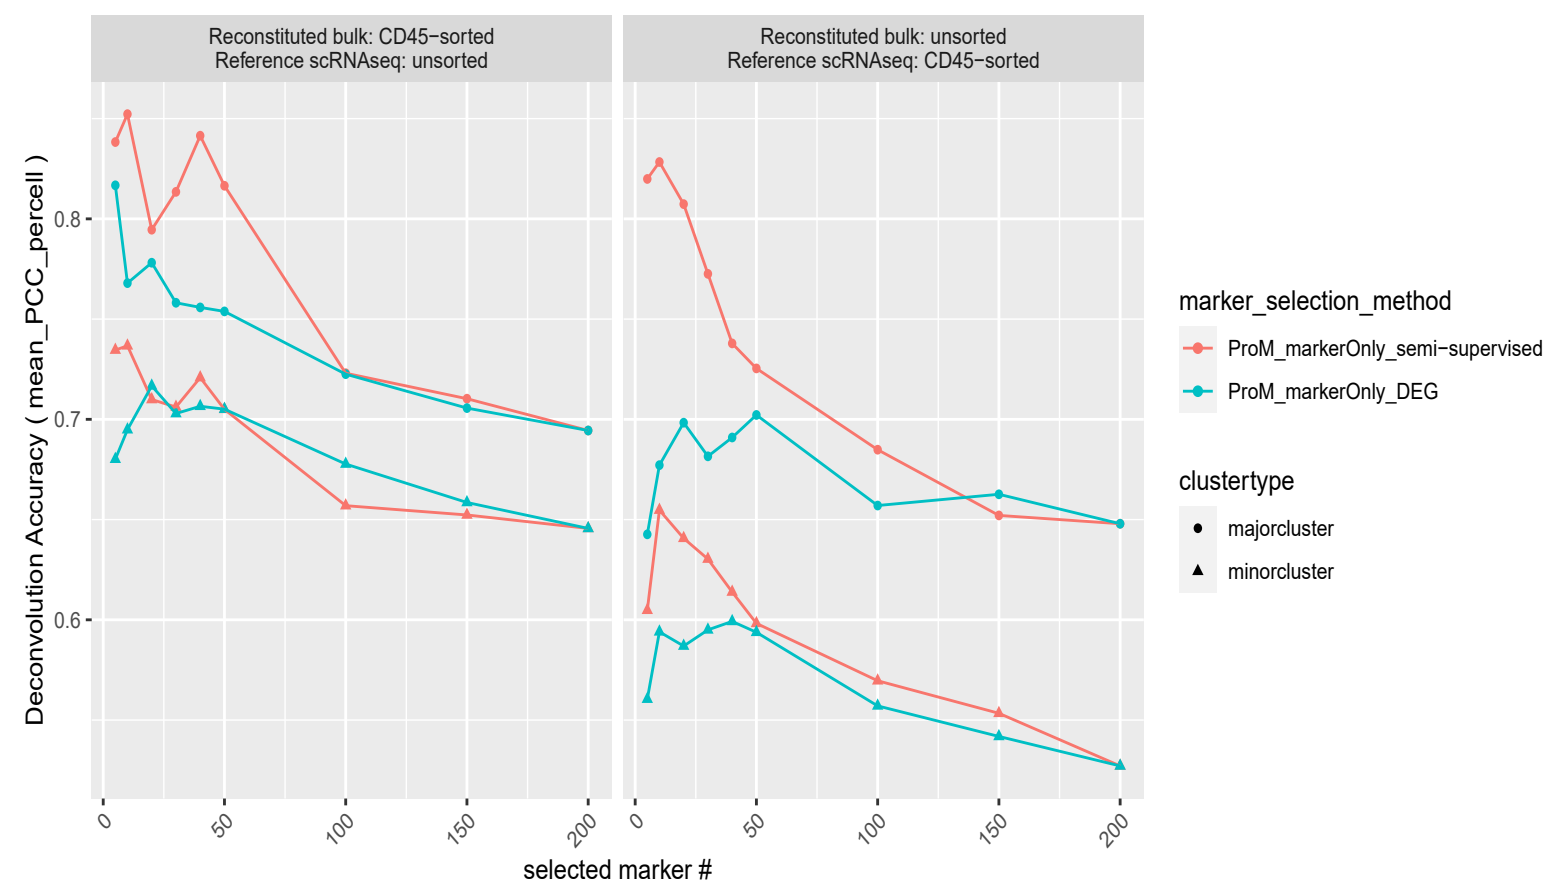

### C Evaluation of the two-phase gene variance modeling

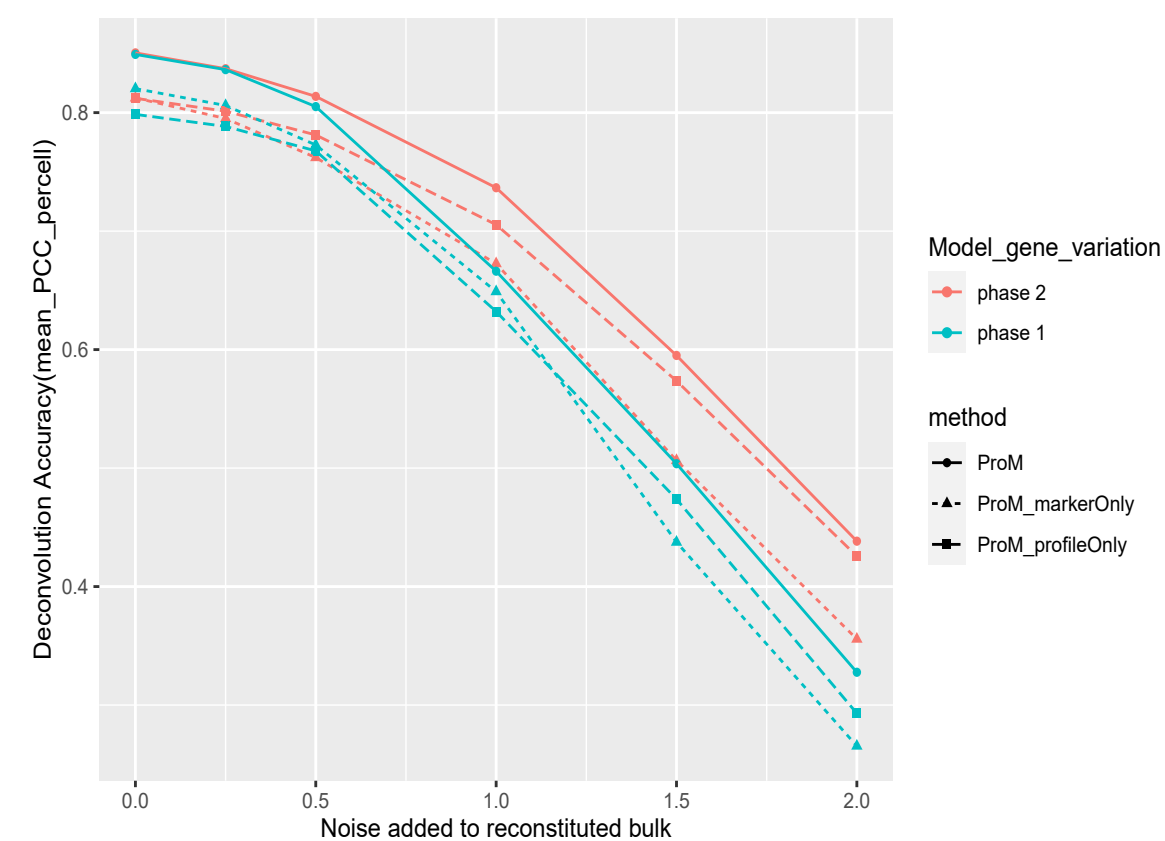

### D Evaluation by reconstituted bulk RNAseq in Pan Cancer

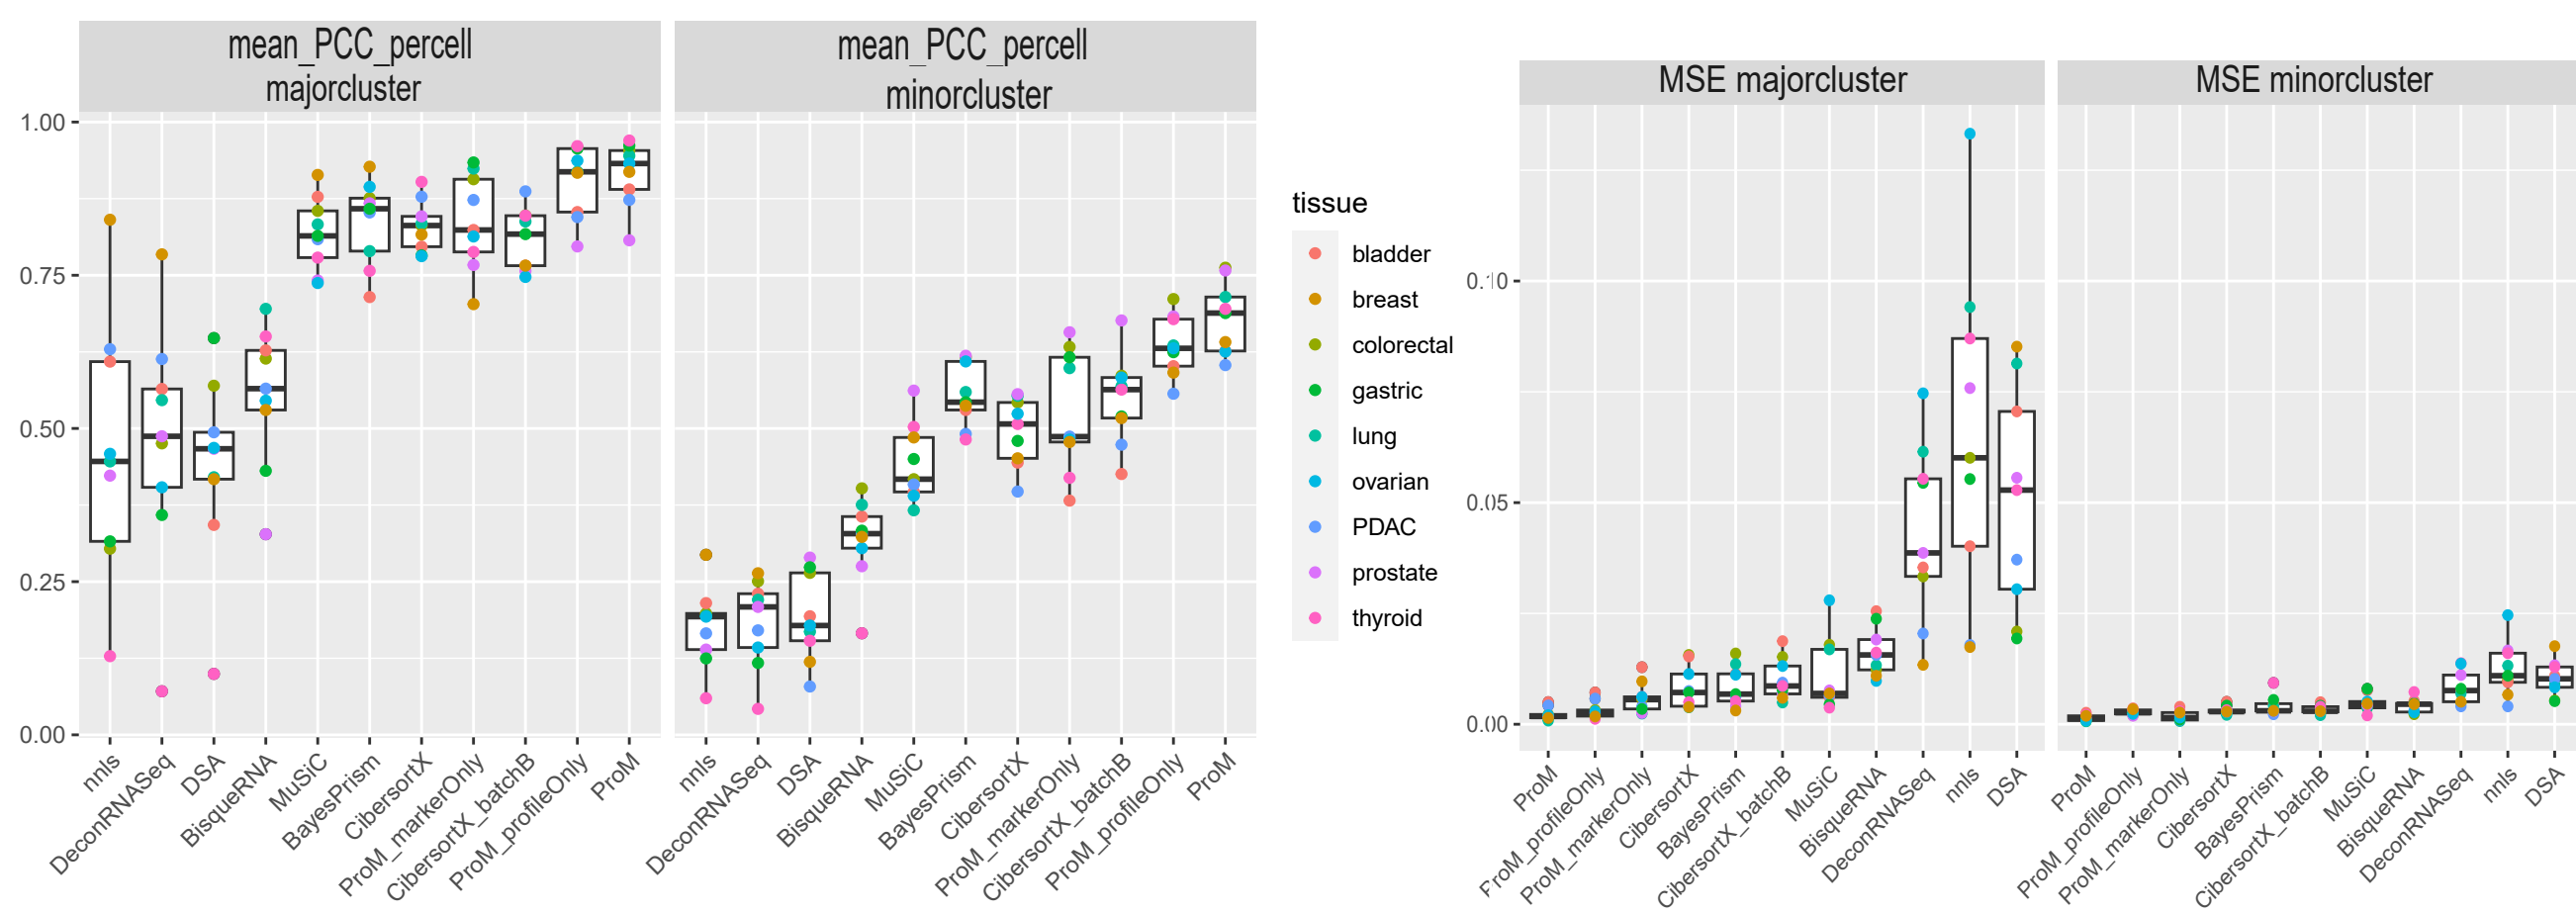

### E Evaluation by paired scRNAseq and bulk RNAseq

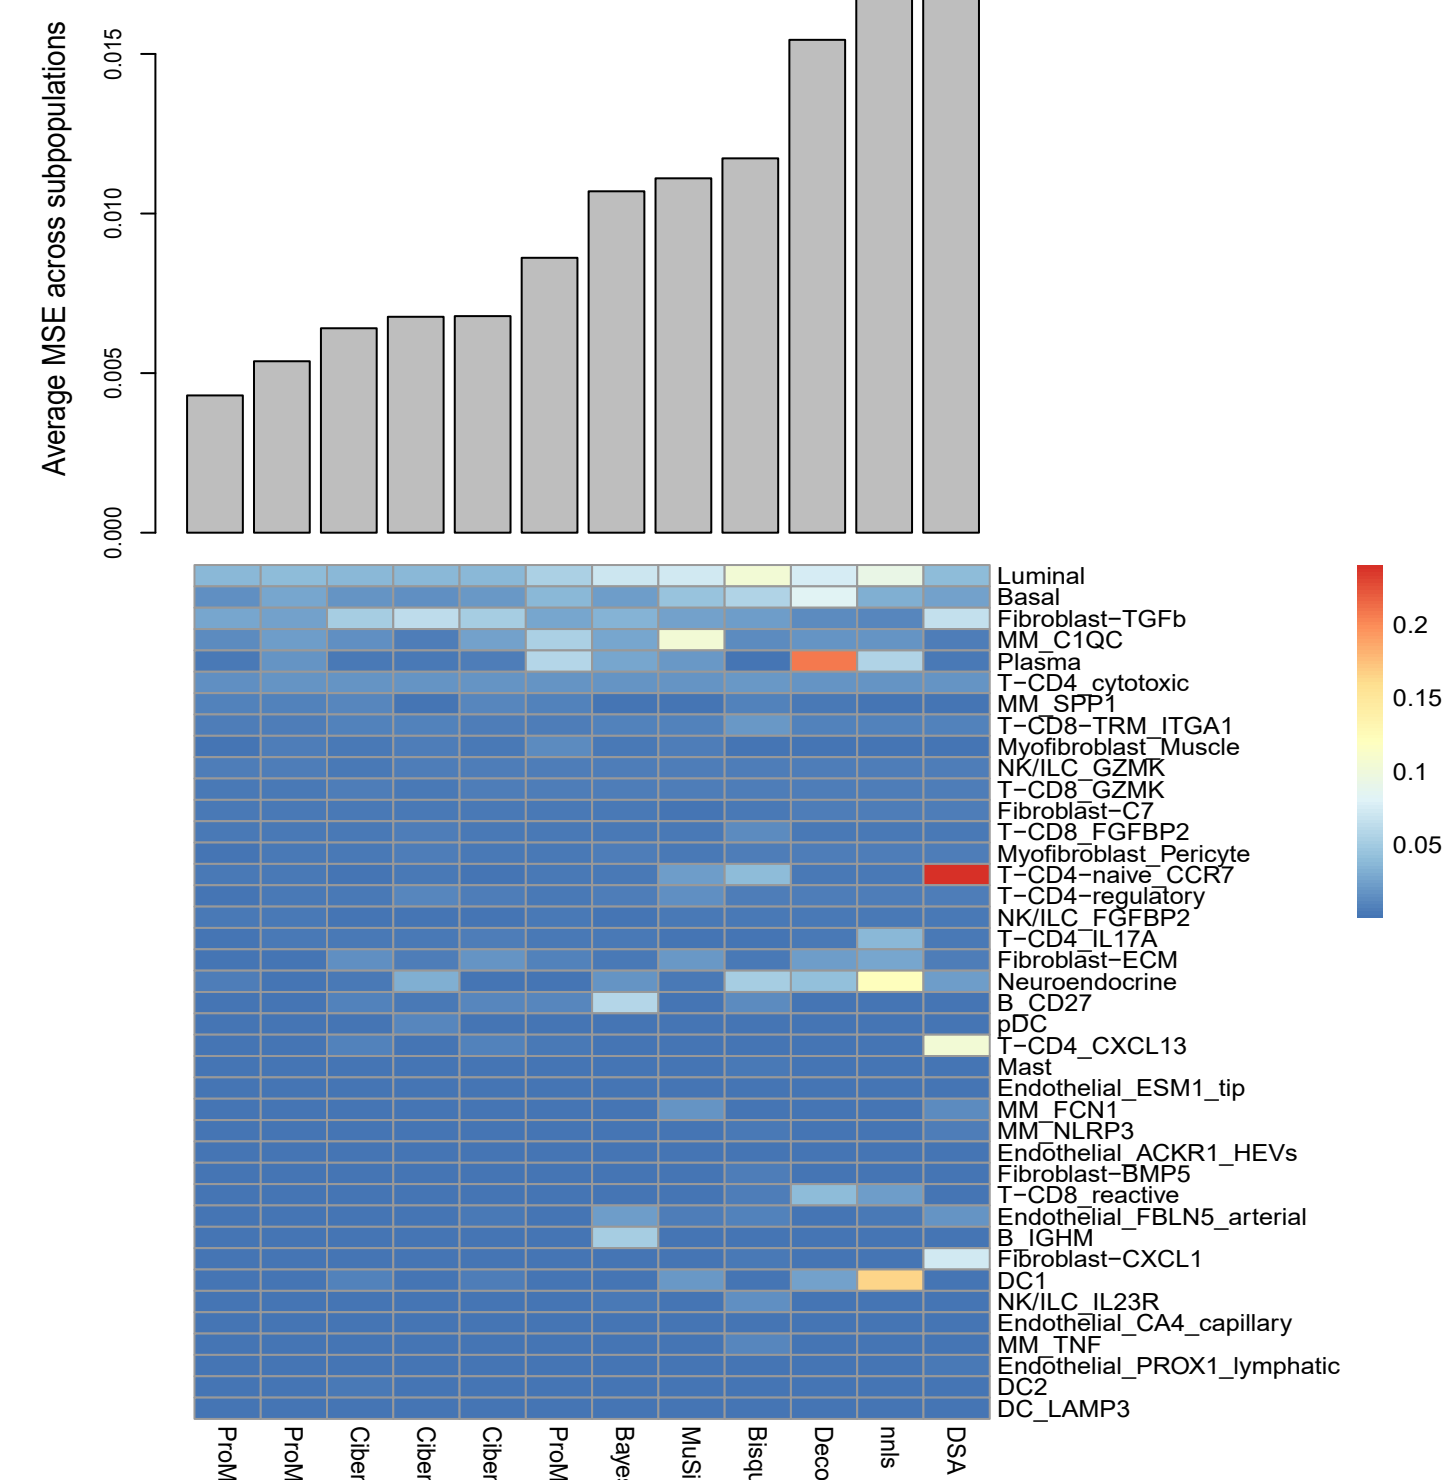

### F scRNAseq observation VS ProM deconvolution

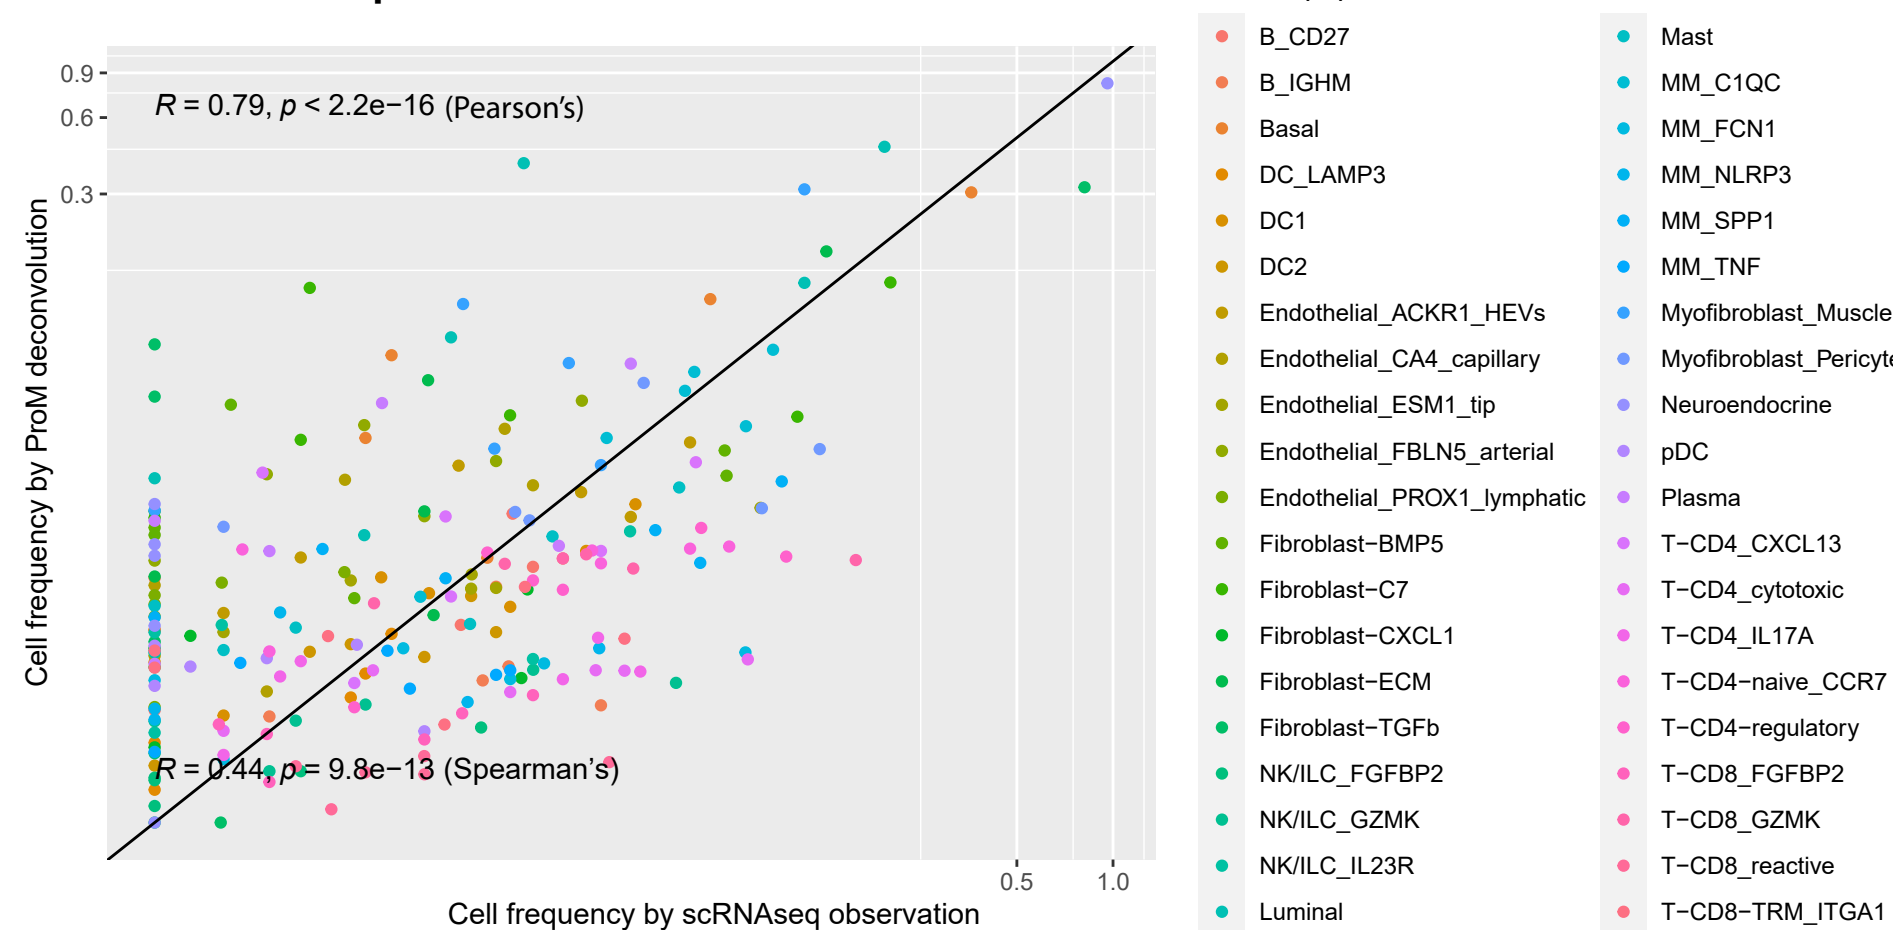

Figure S2

A

### Inferred single cell CNV for epithelial cells SI\_651(22144)

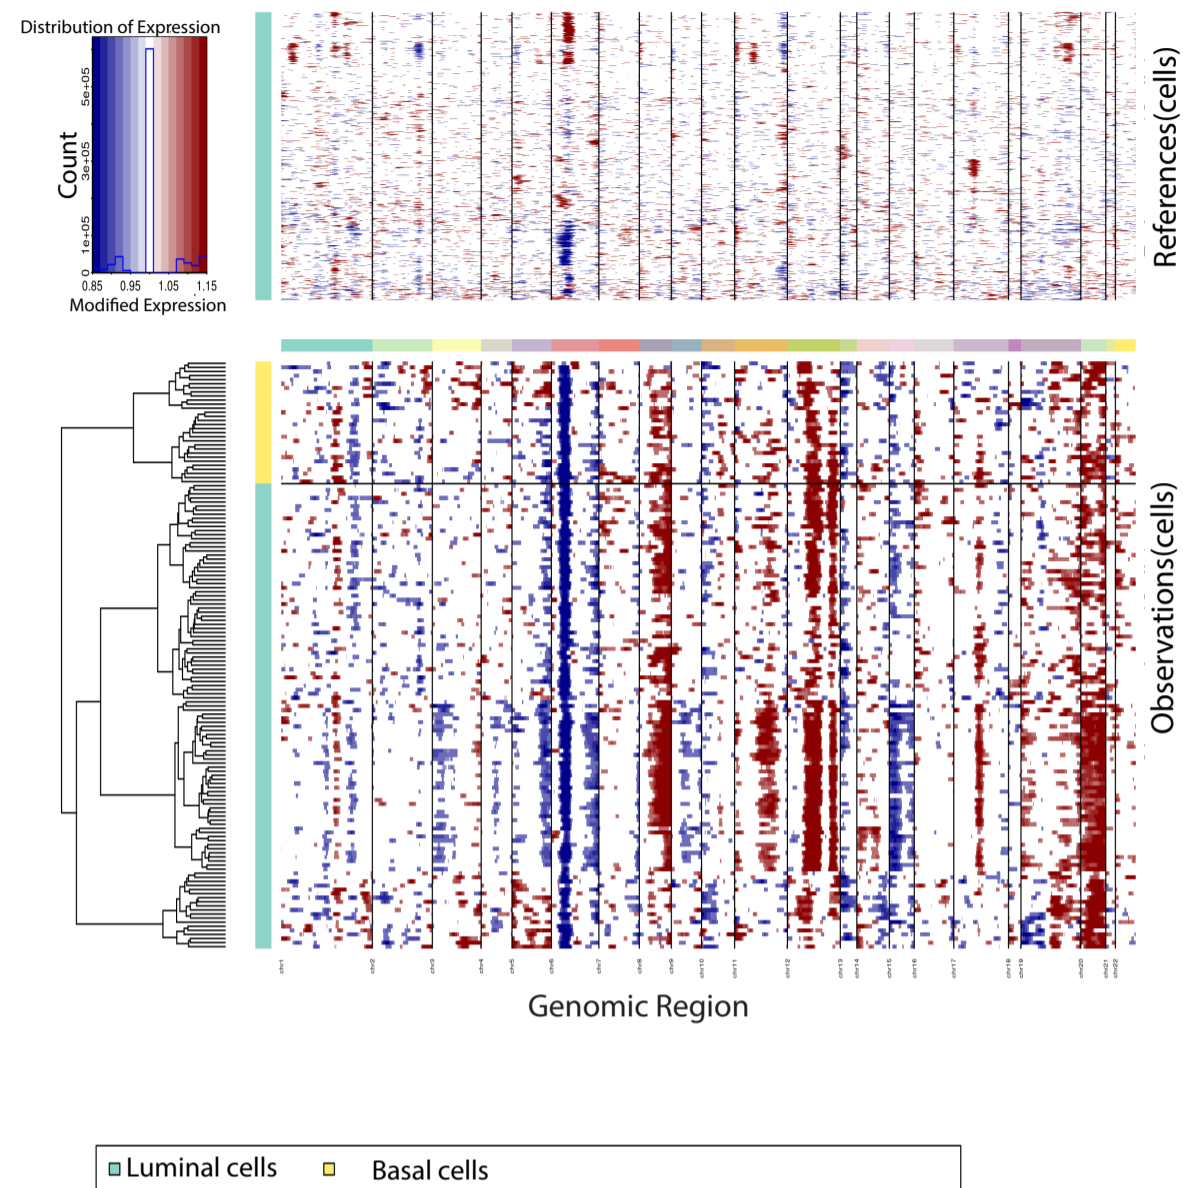

C

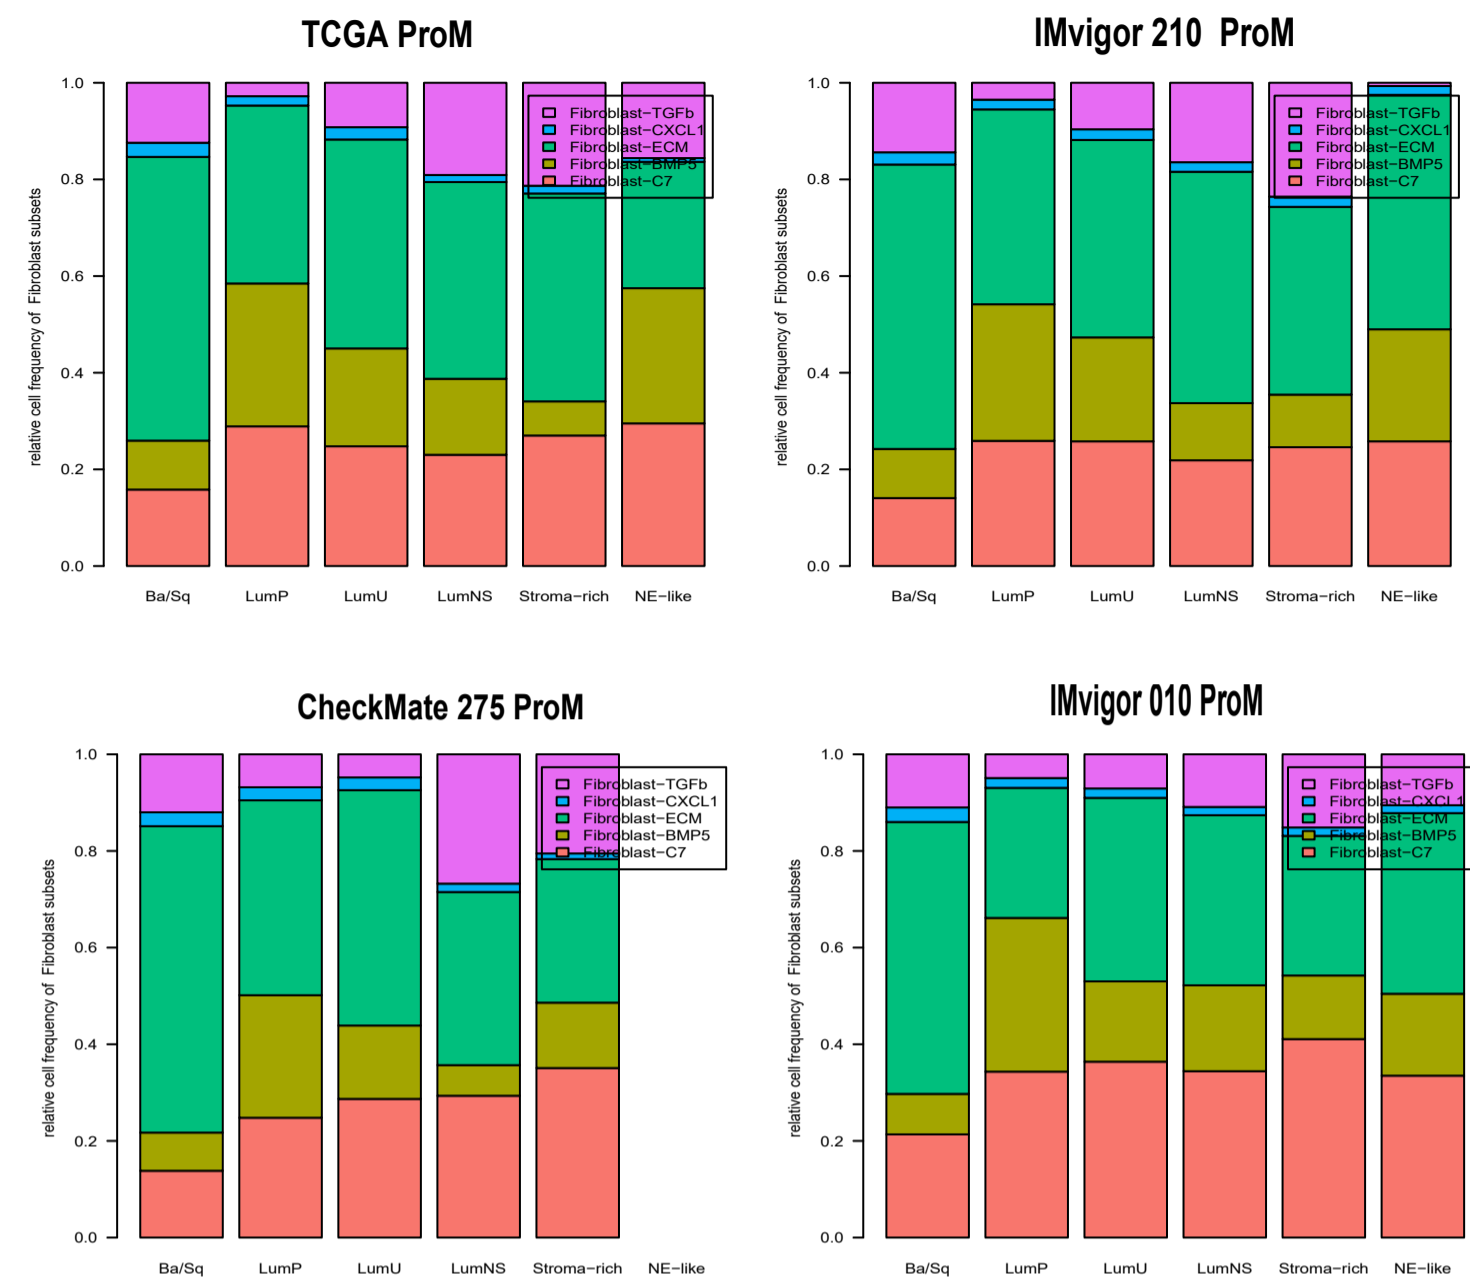

B

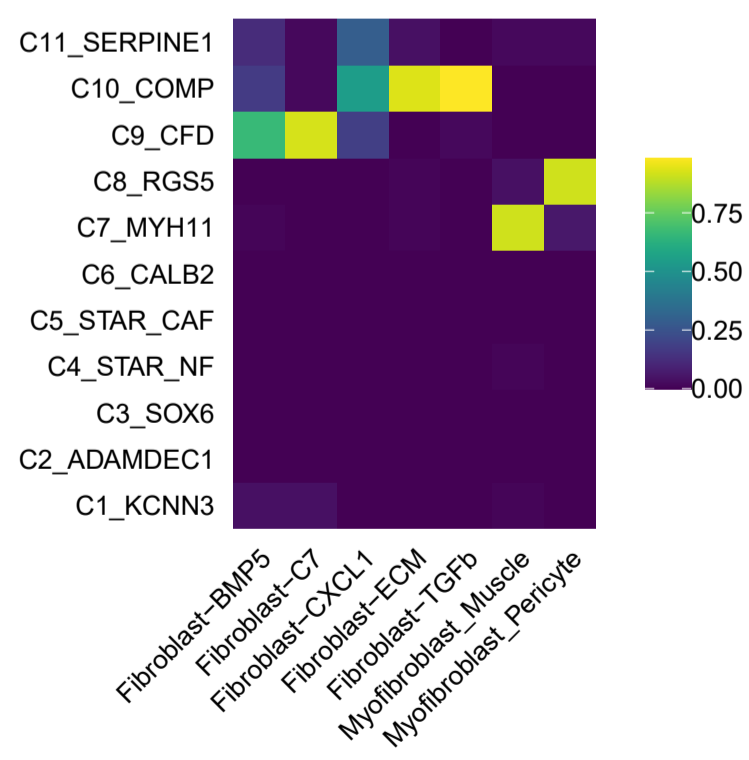

D

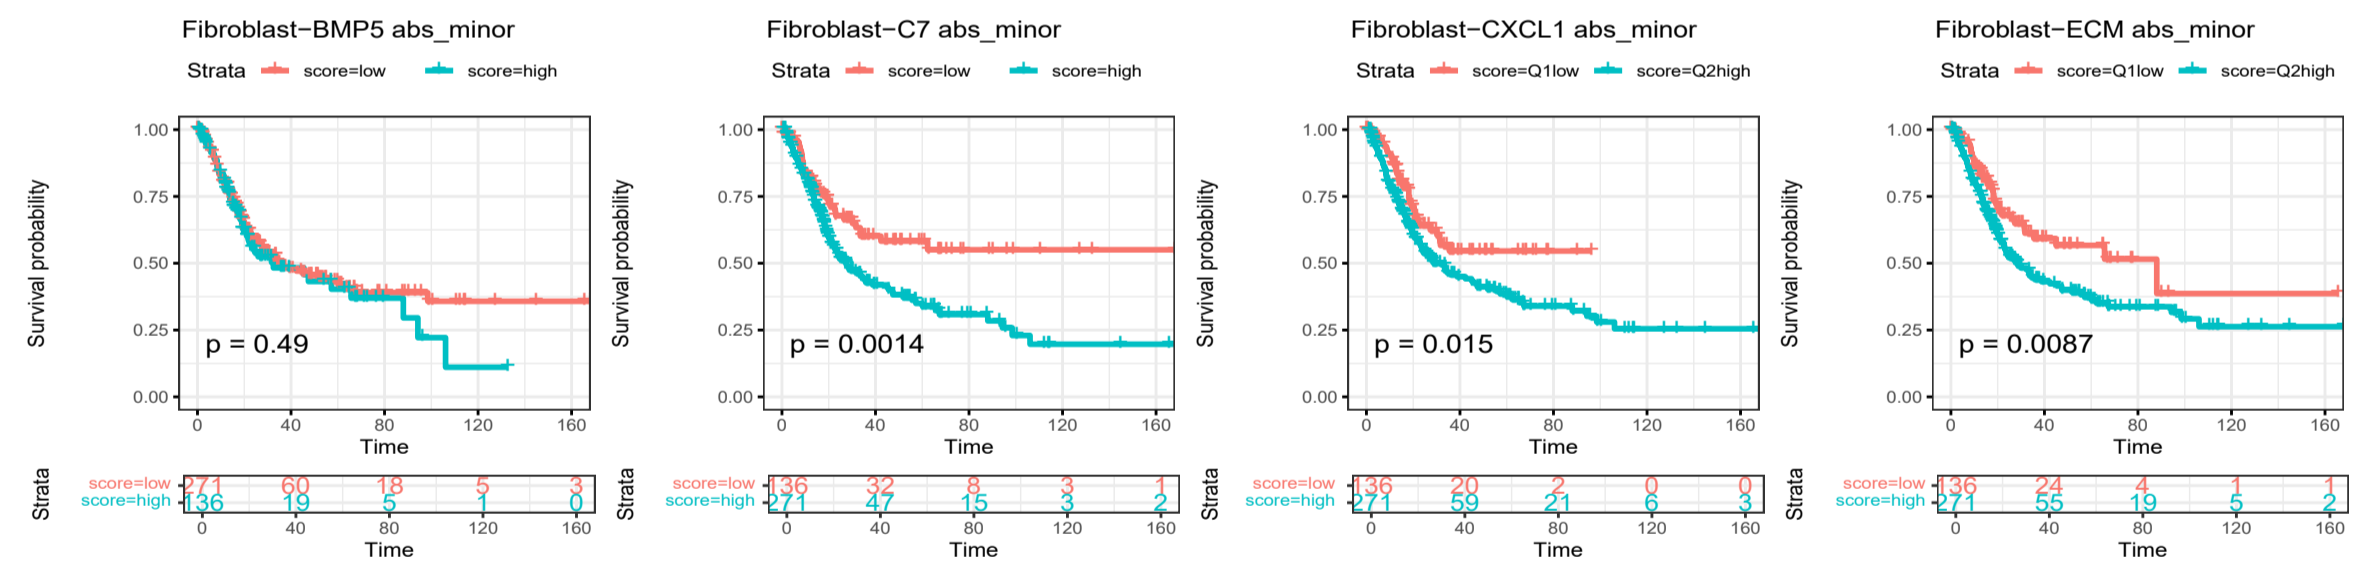

E

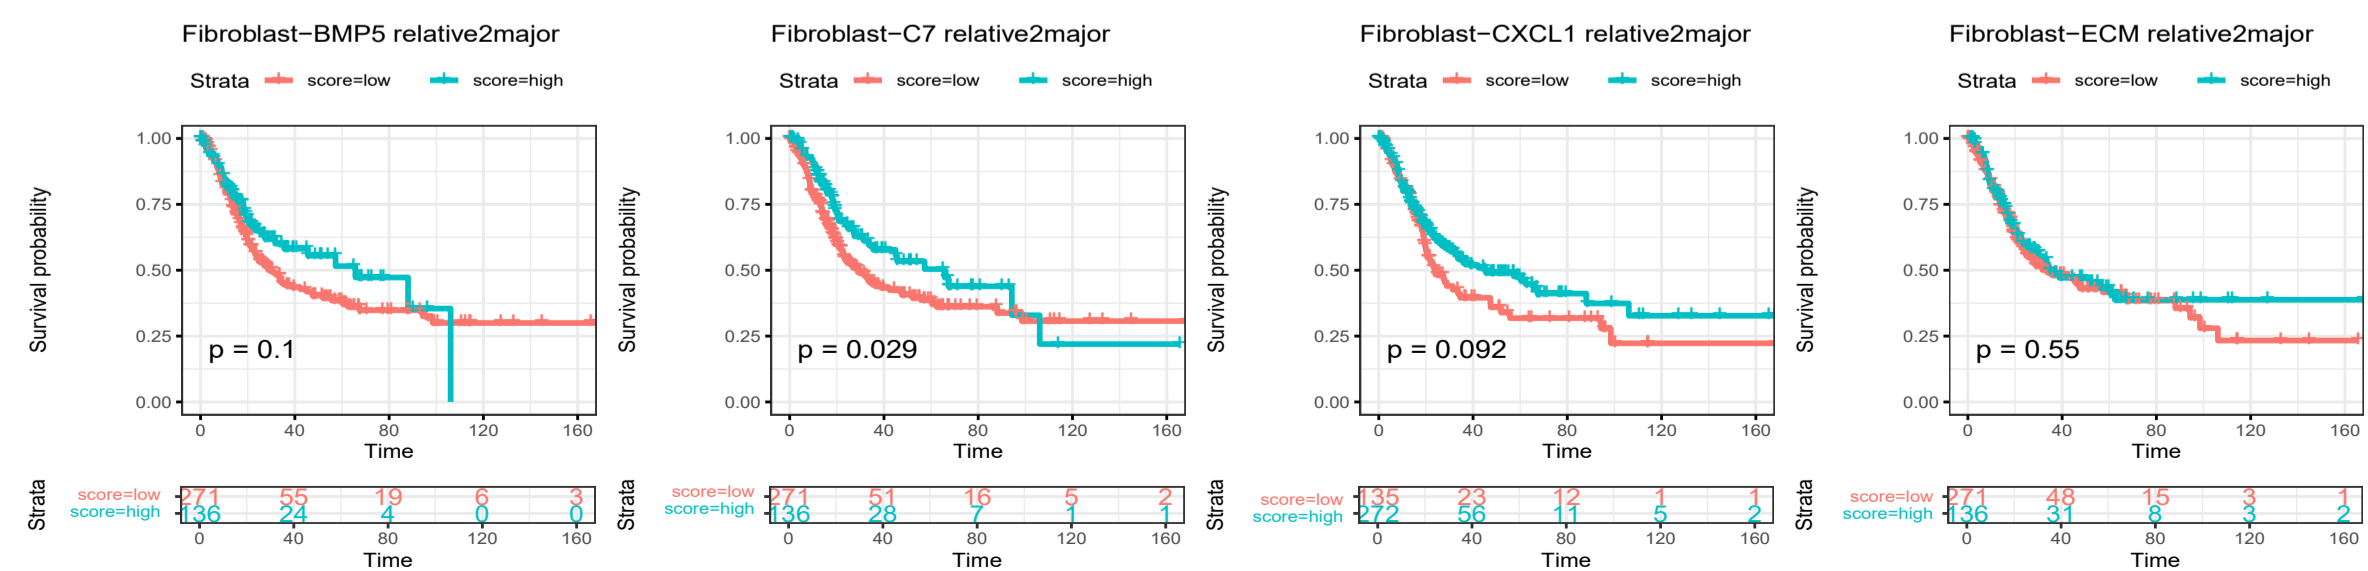

Figure S3

**A** Training PD-L1 cohort: IMvigor 210 and CheckMate 275

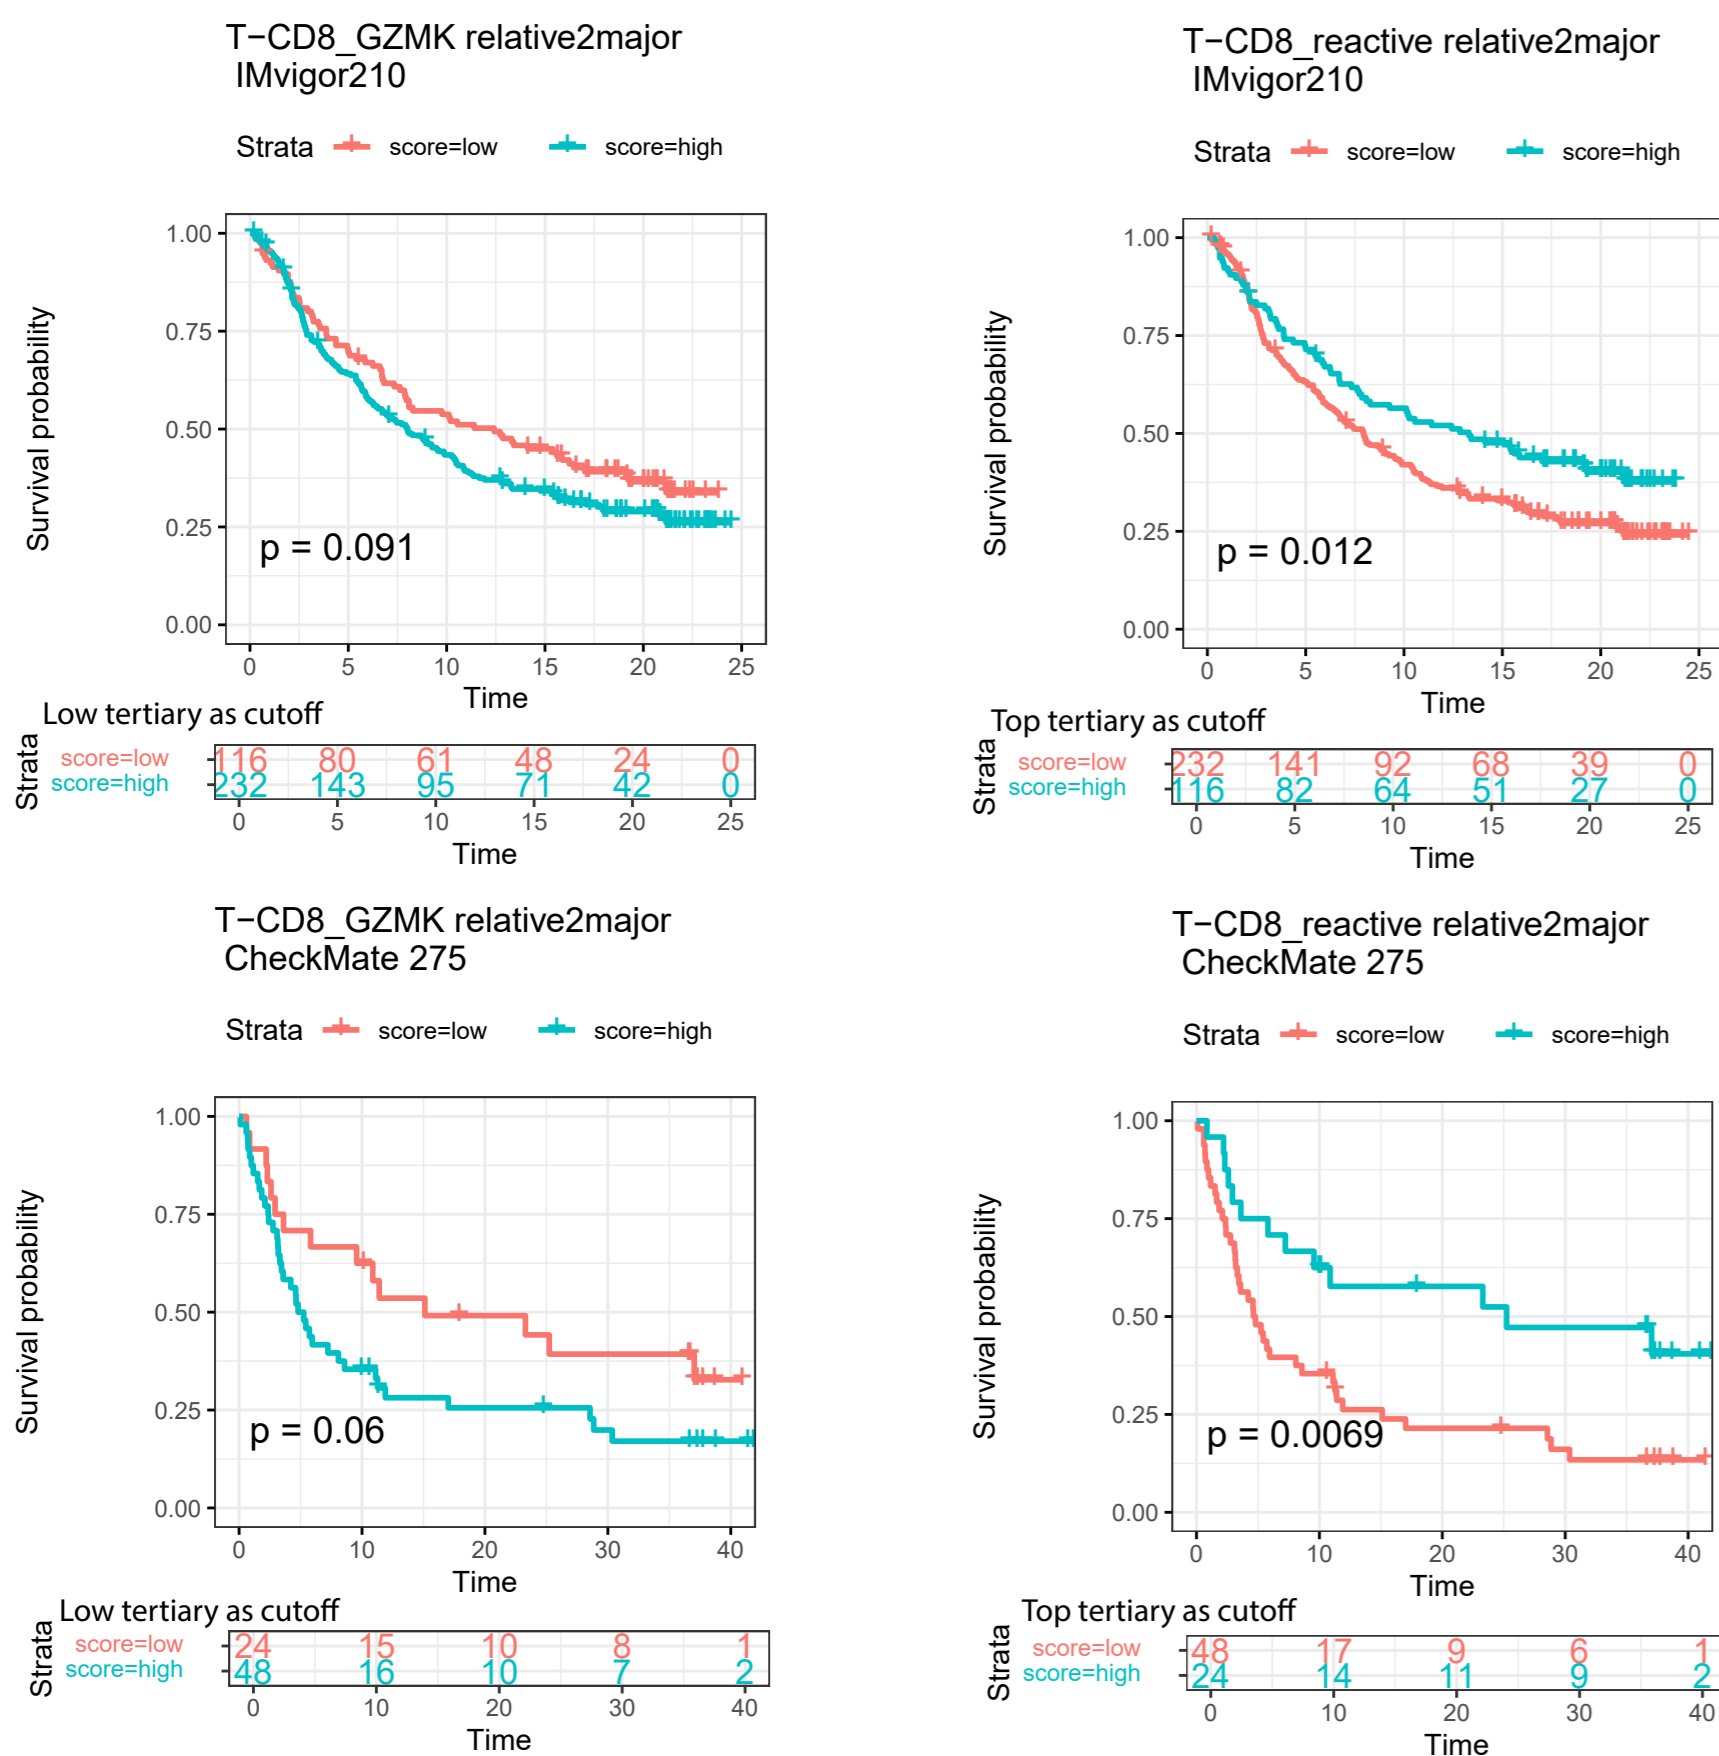

Validation PD-L1 cohort: IMvigor 010

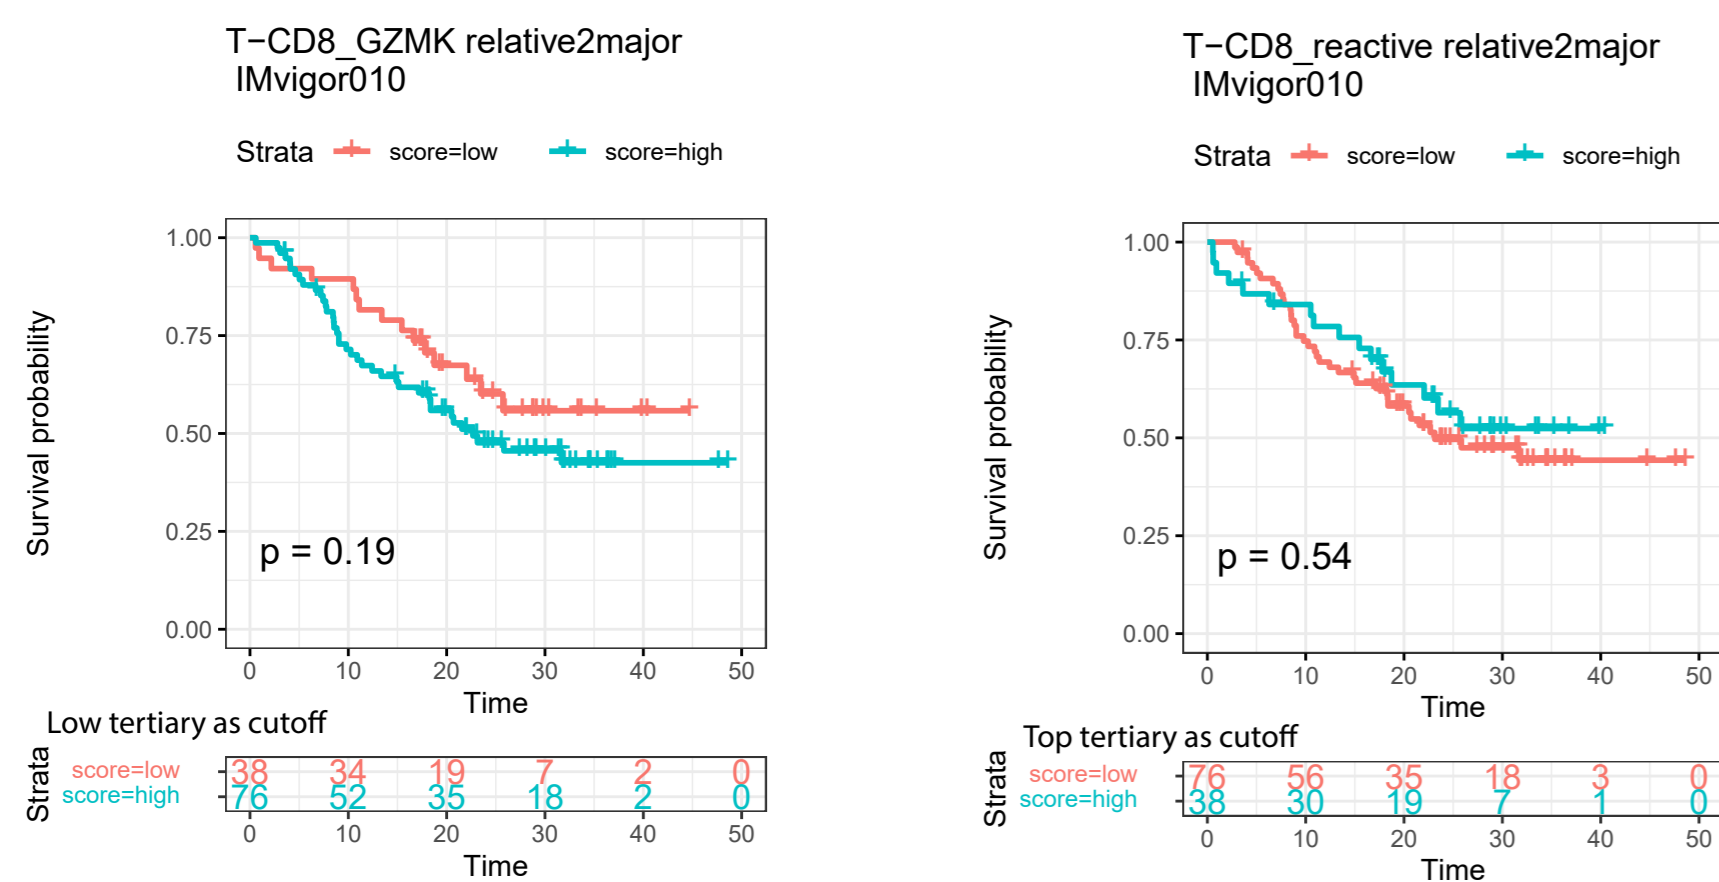

**B**

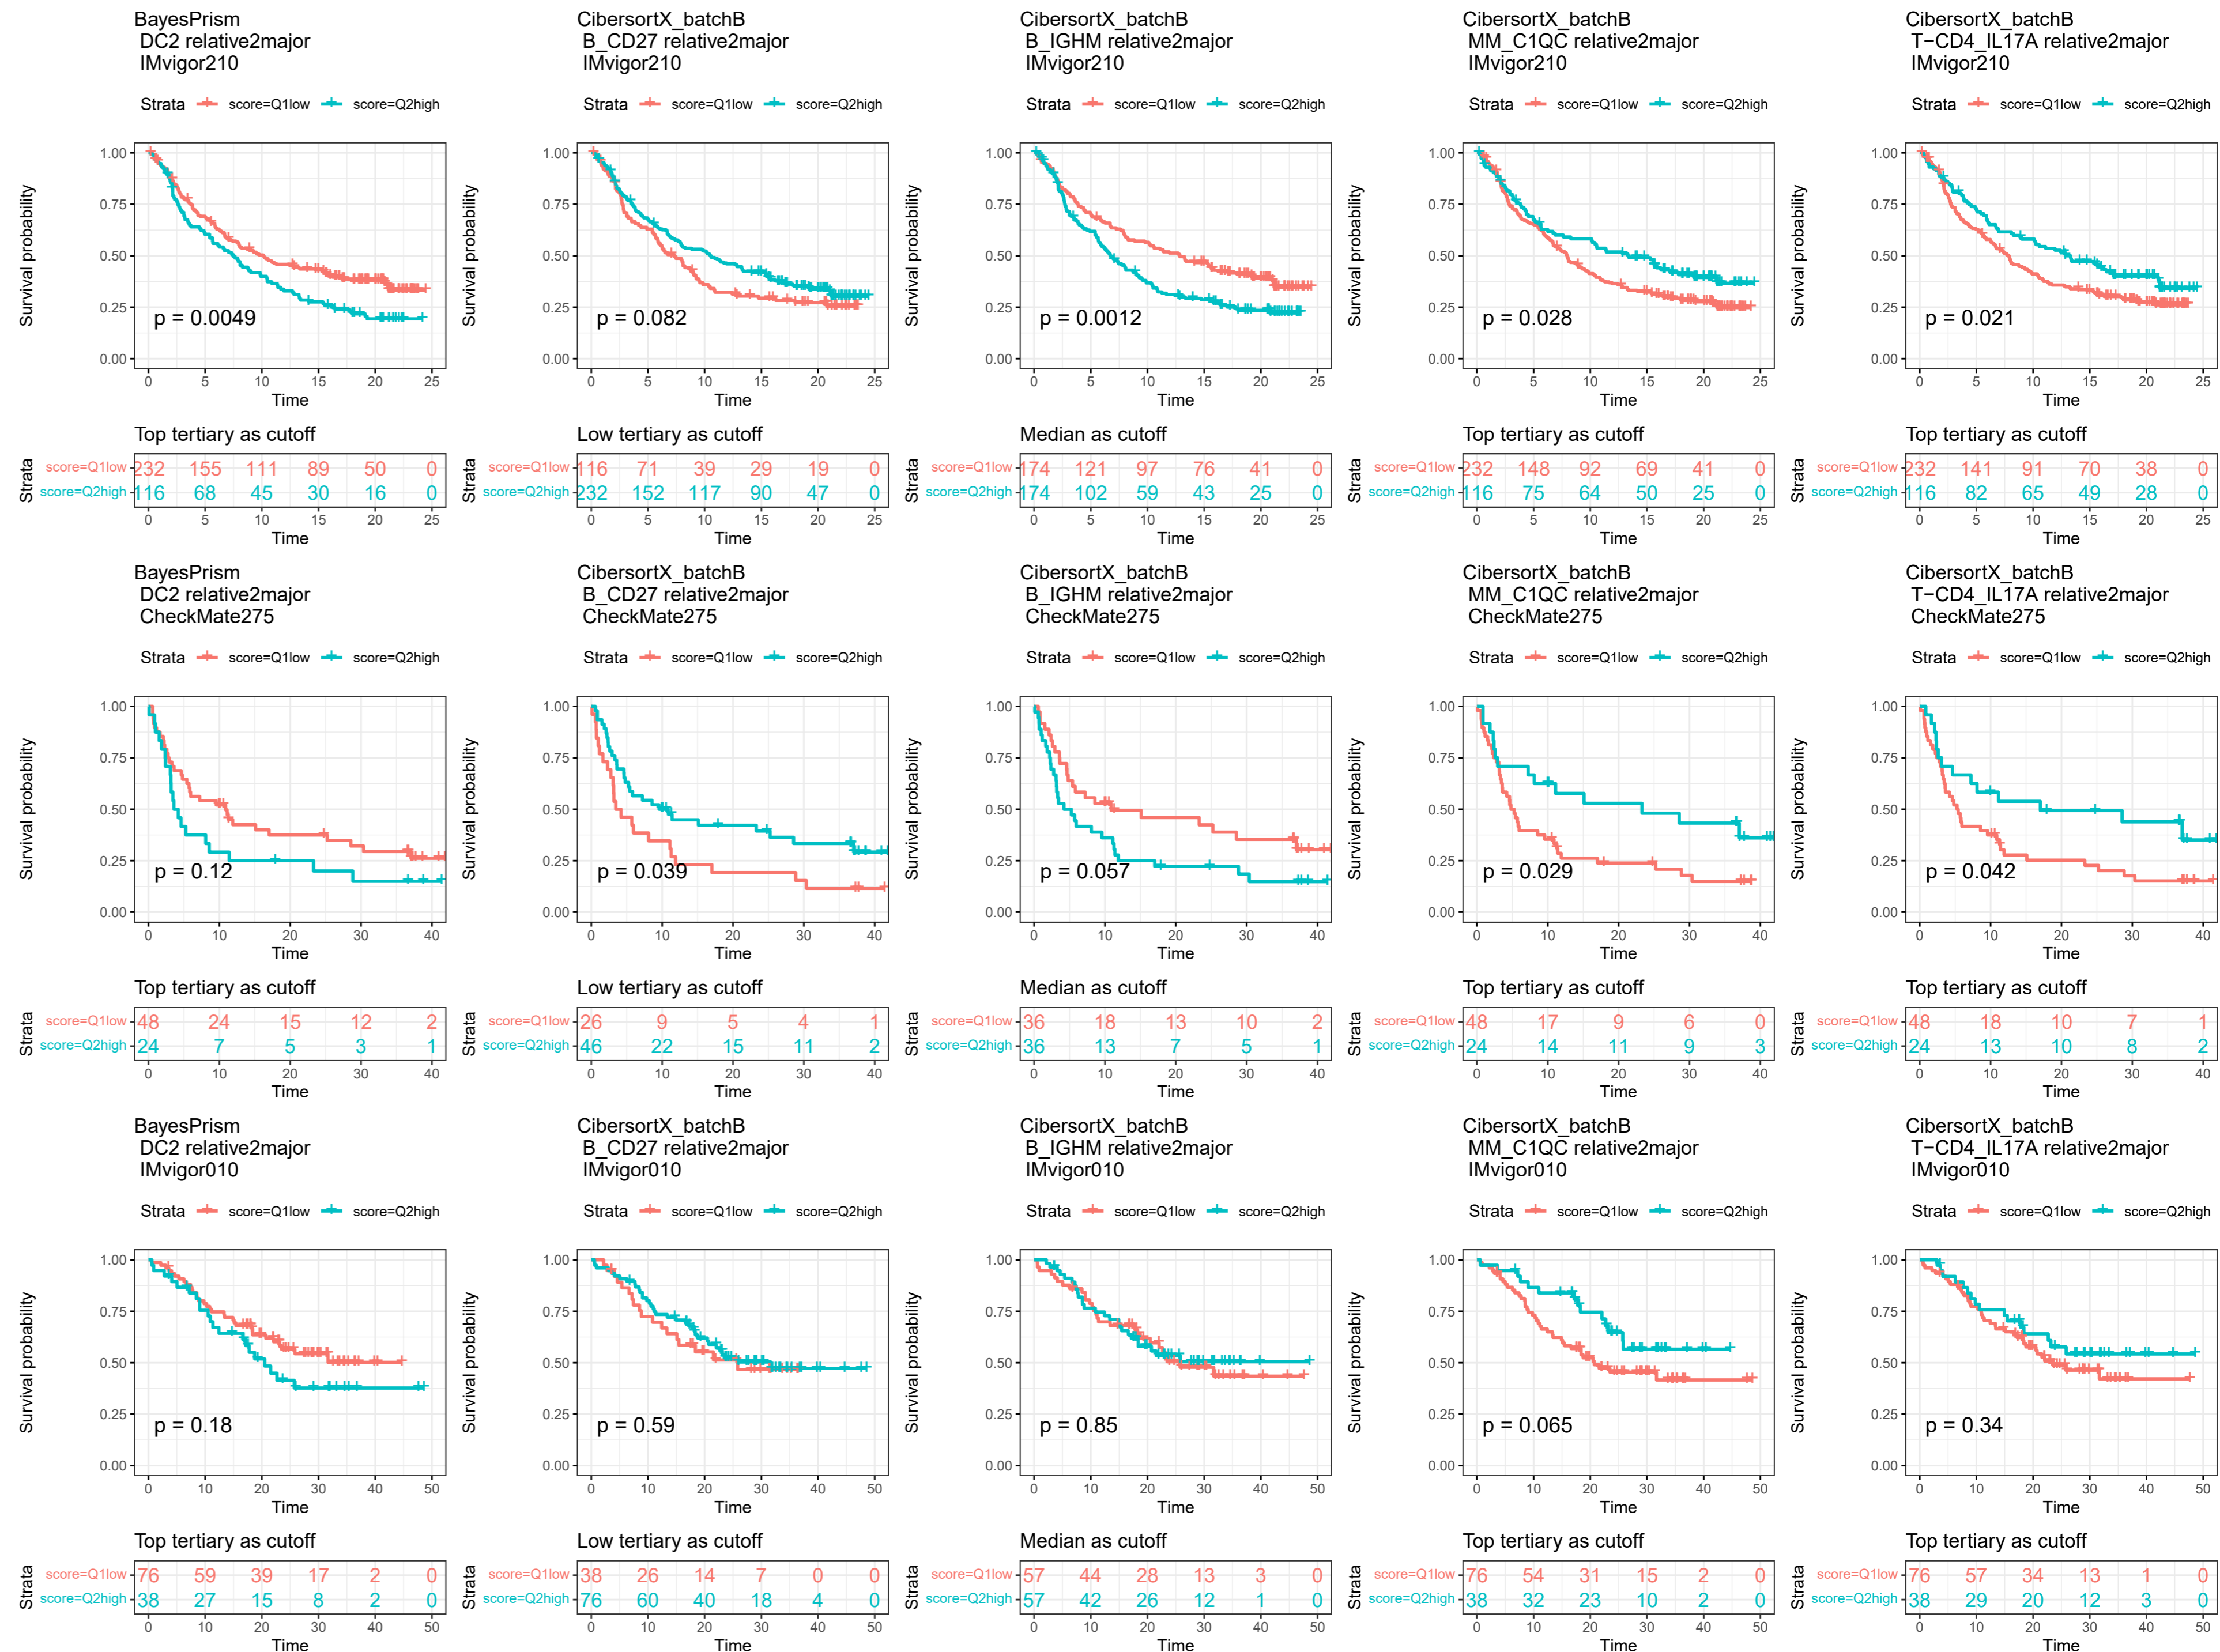

Figure S4

# Pixel-level marker expression by IMC

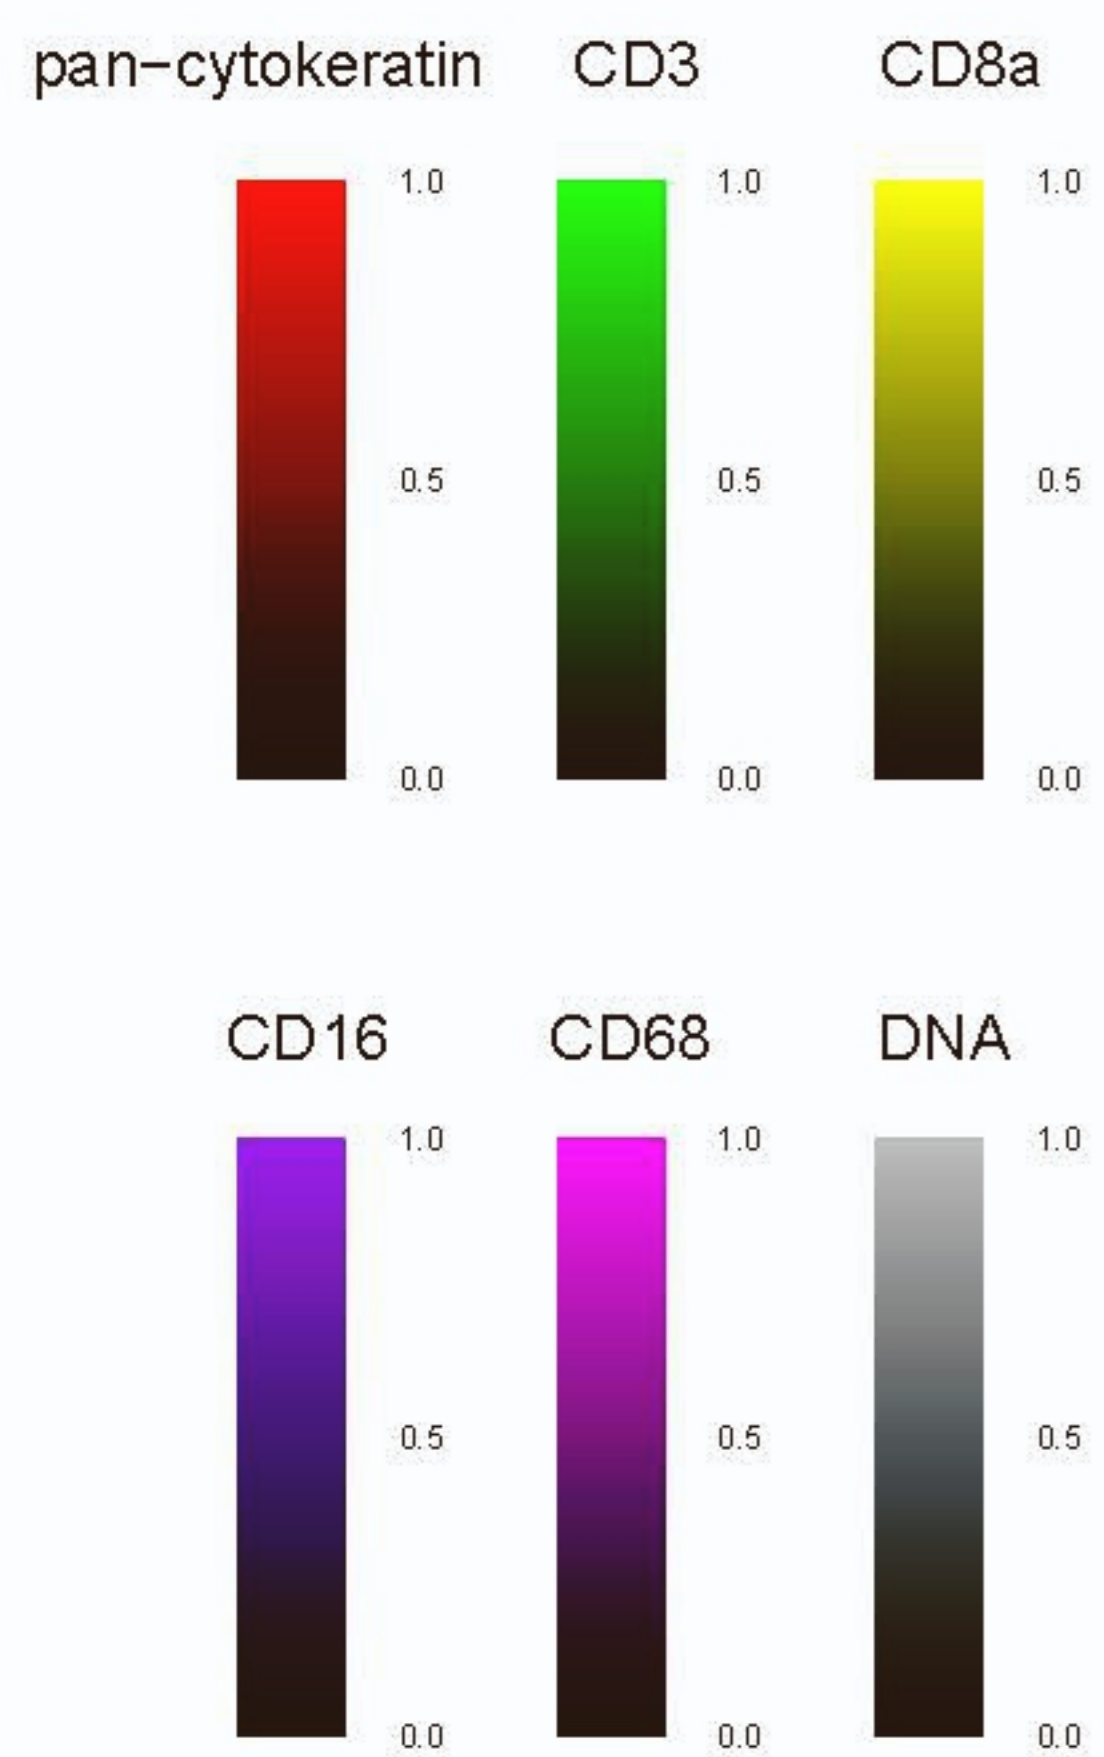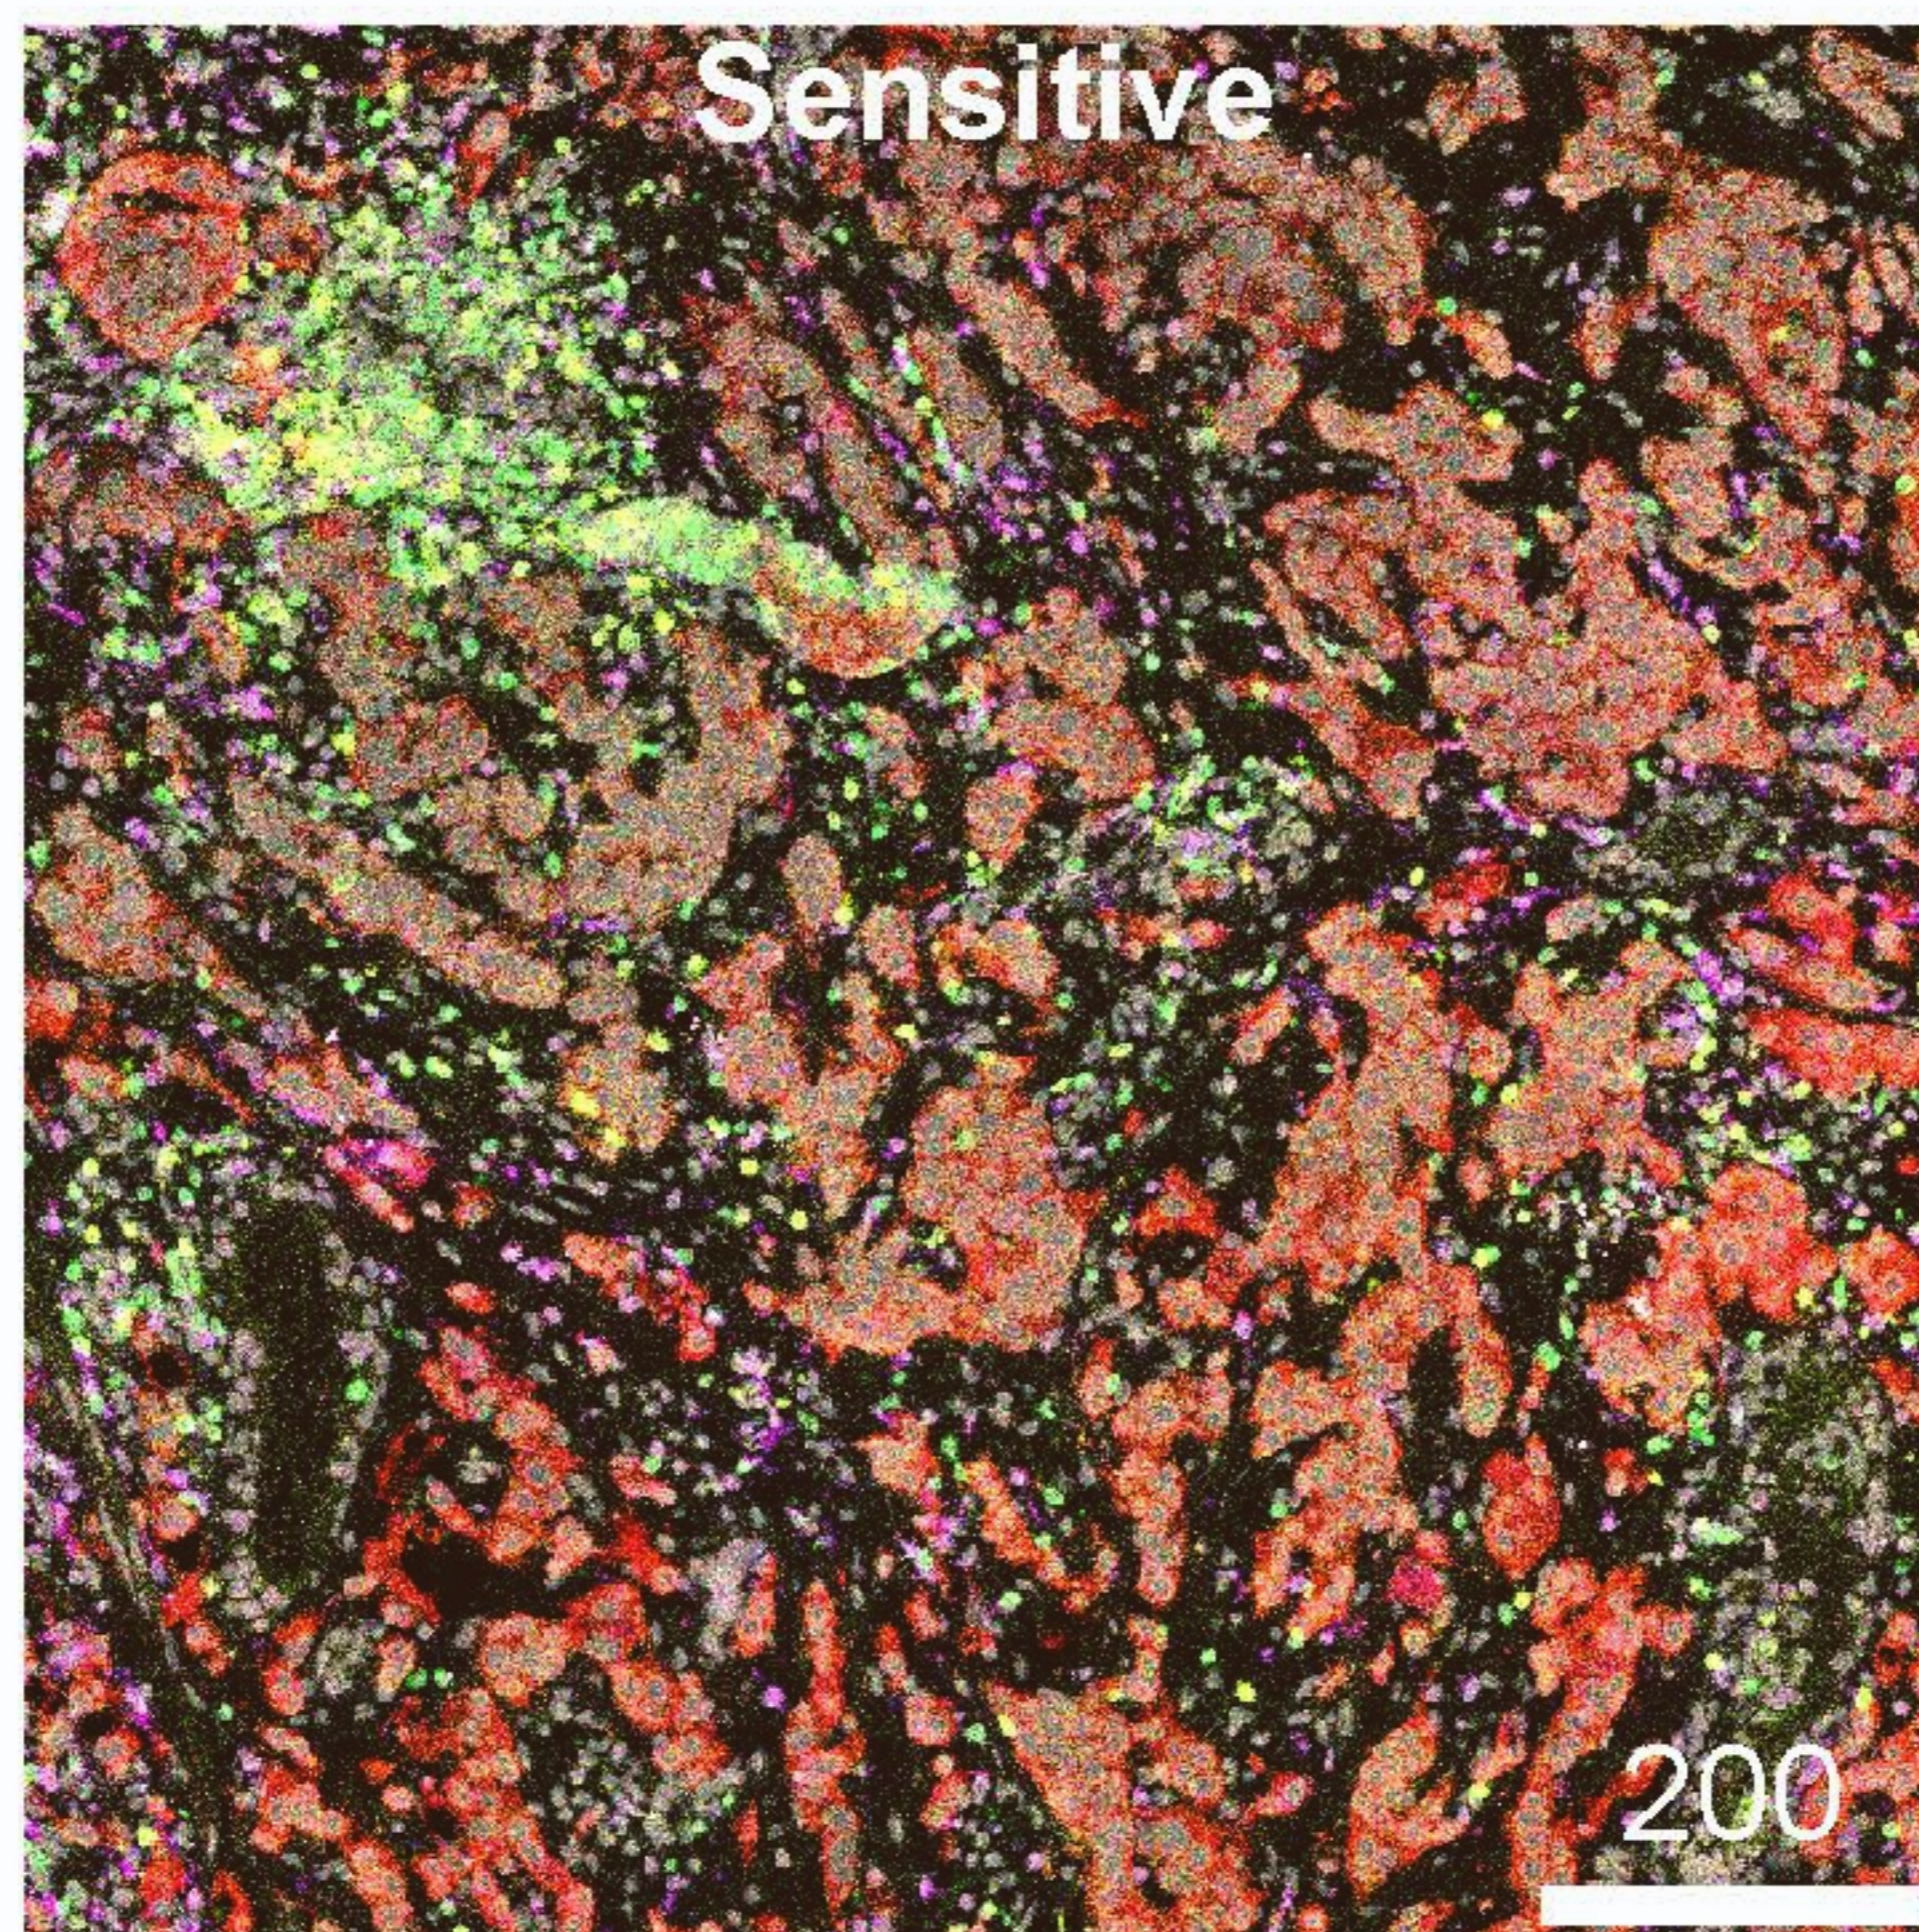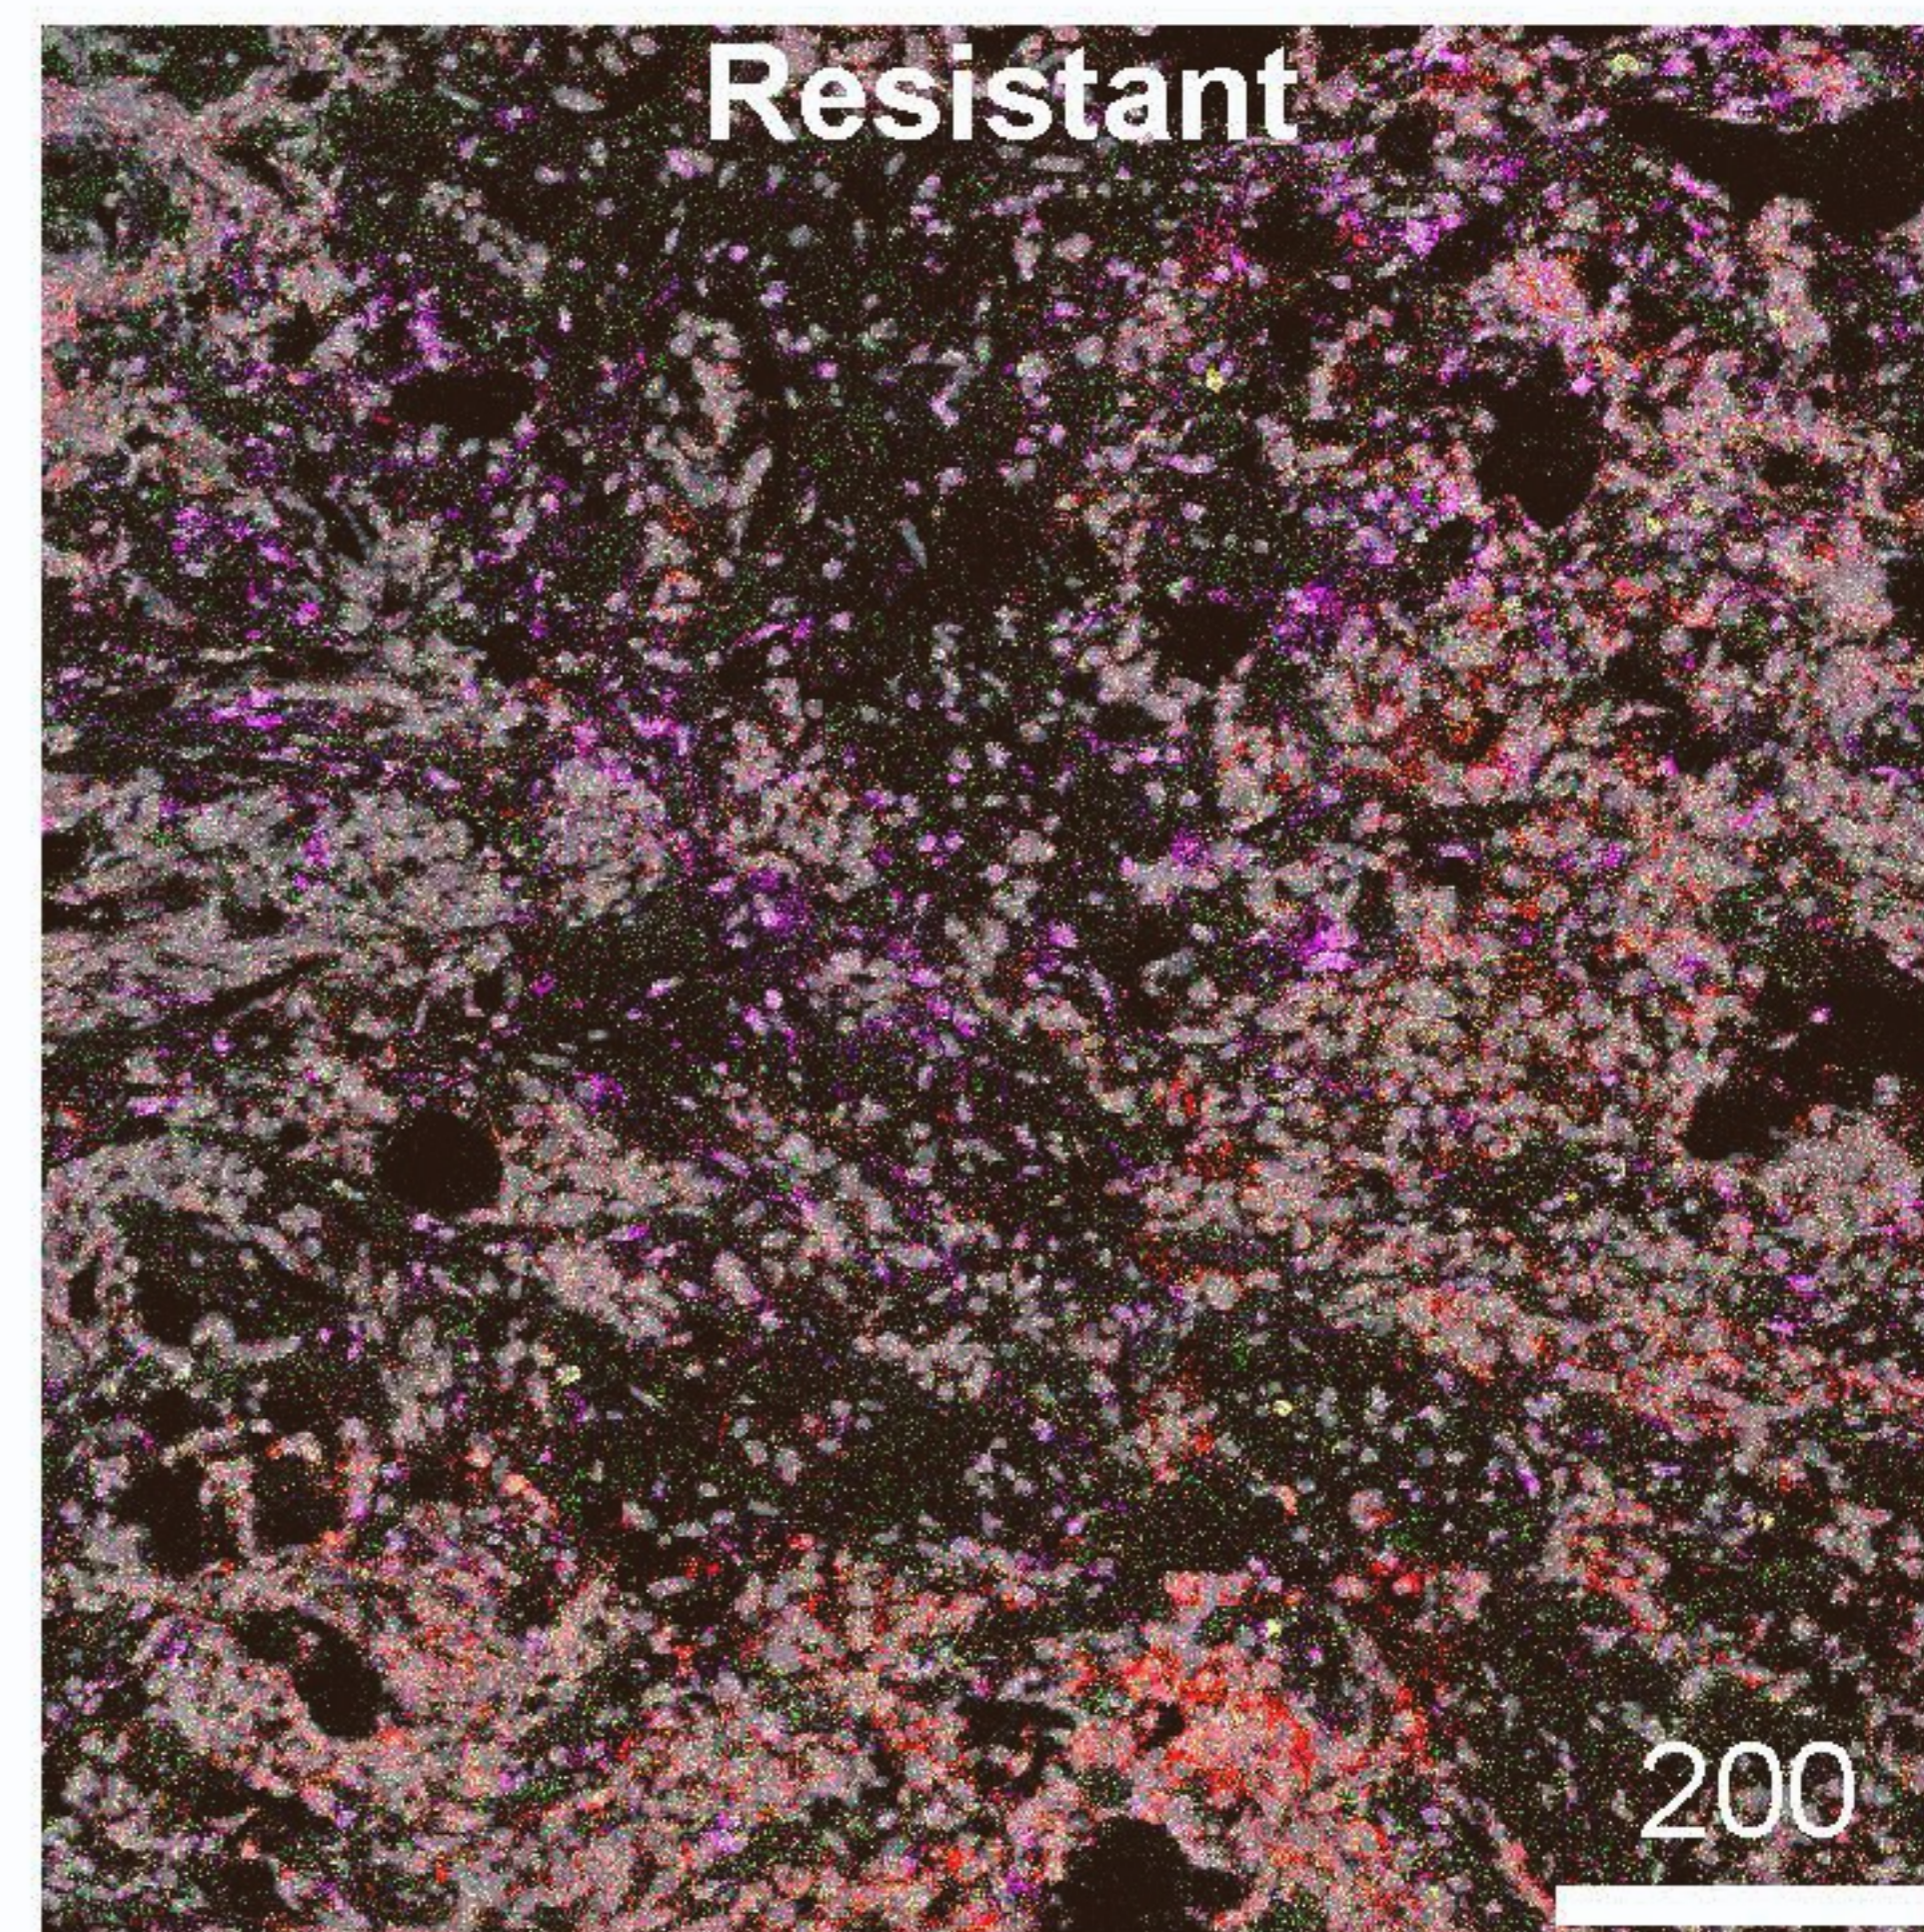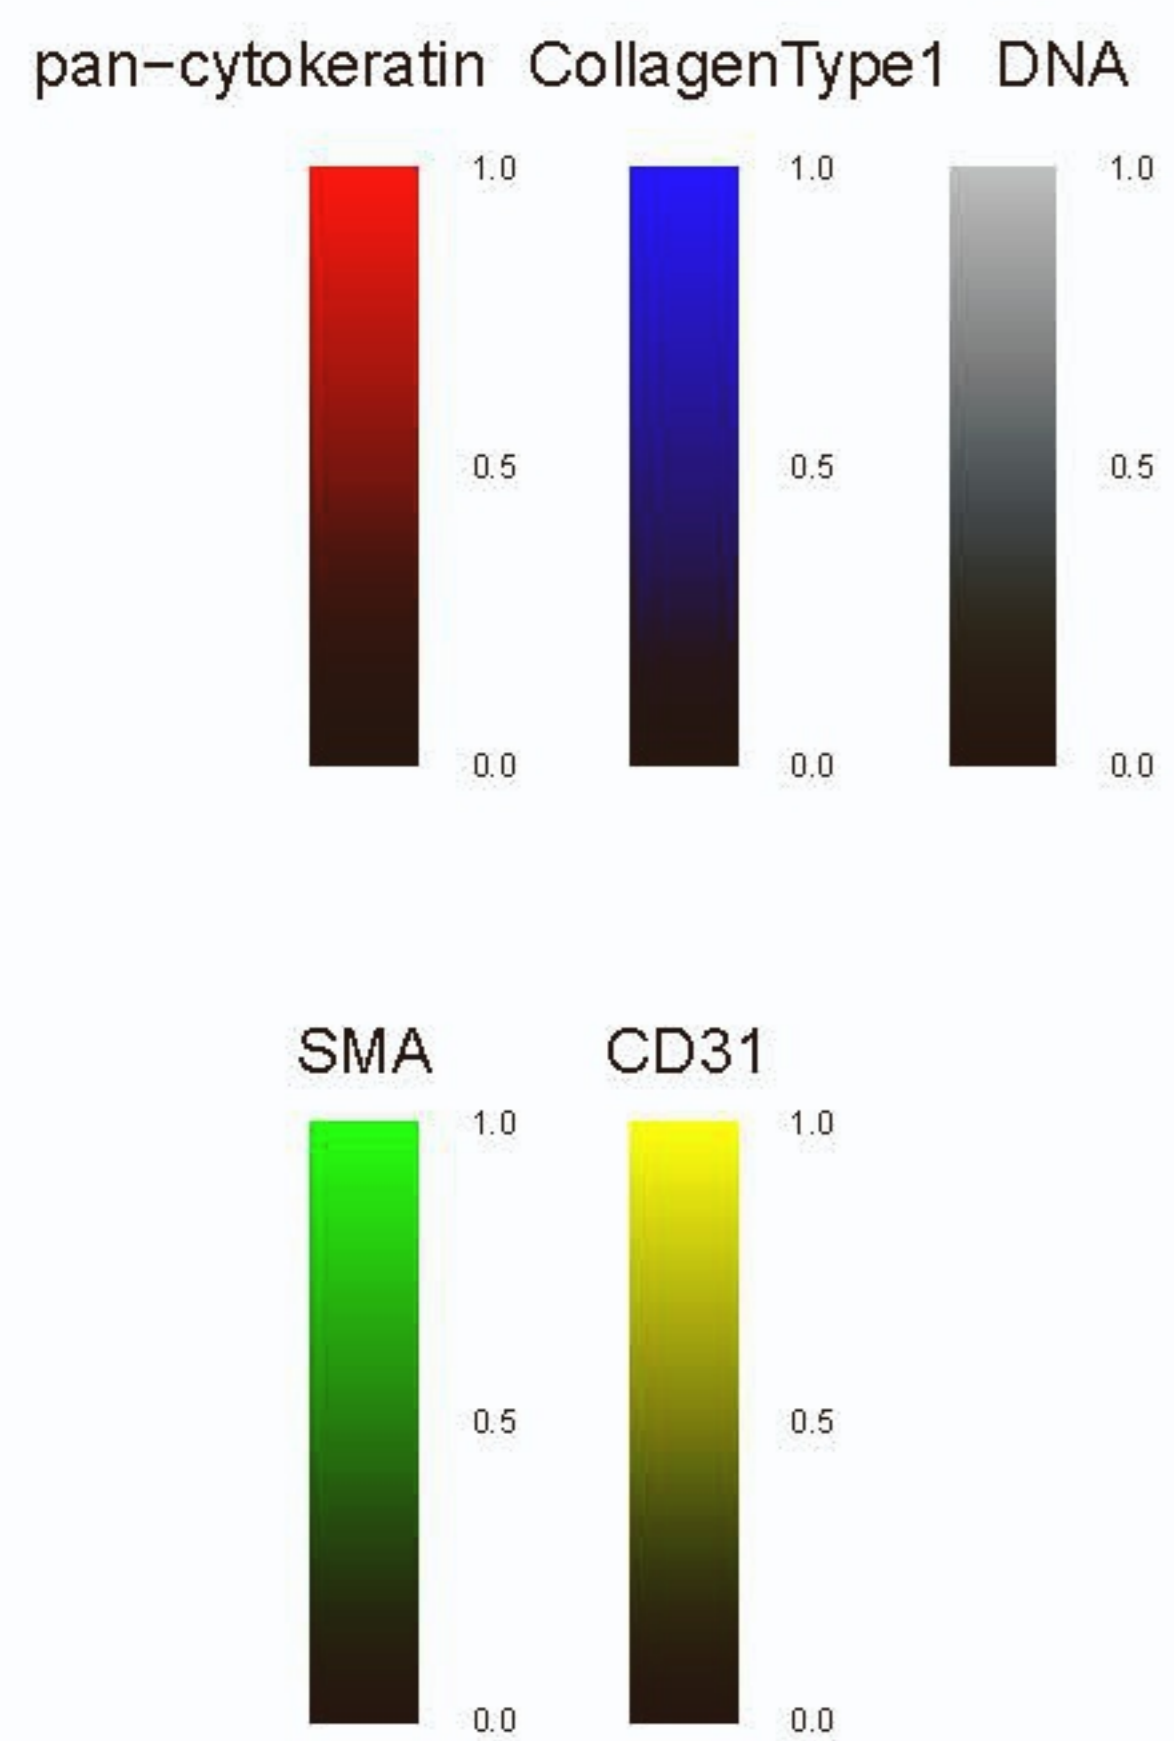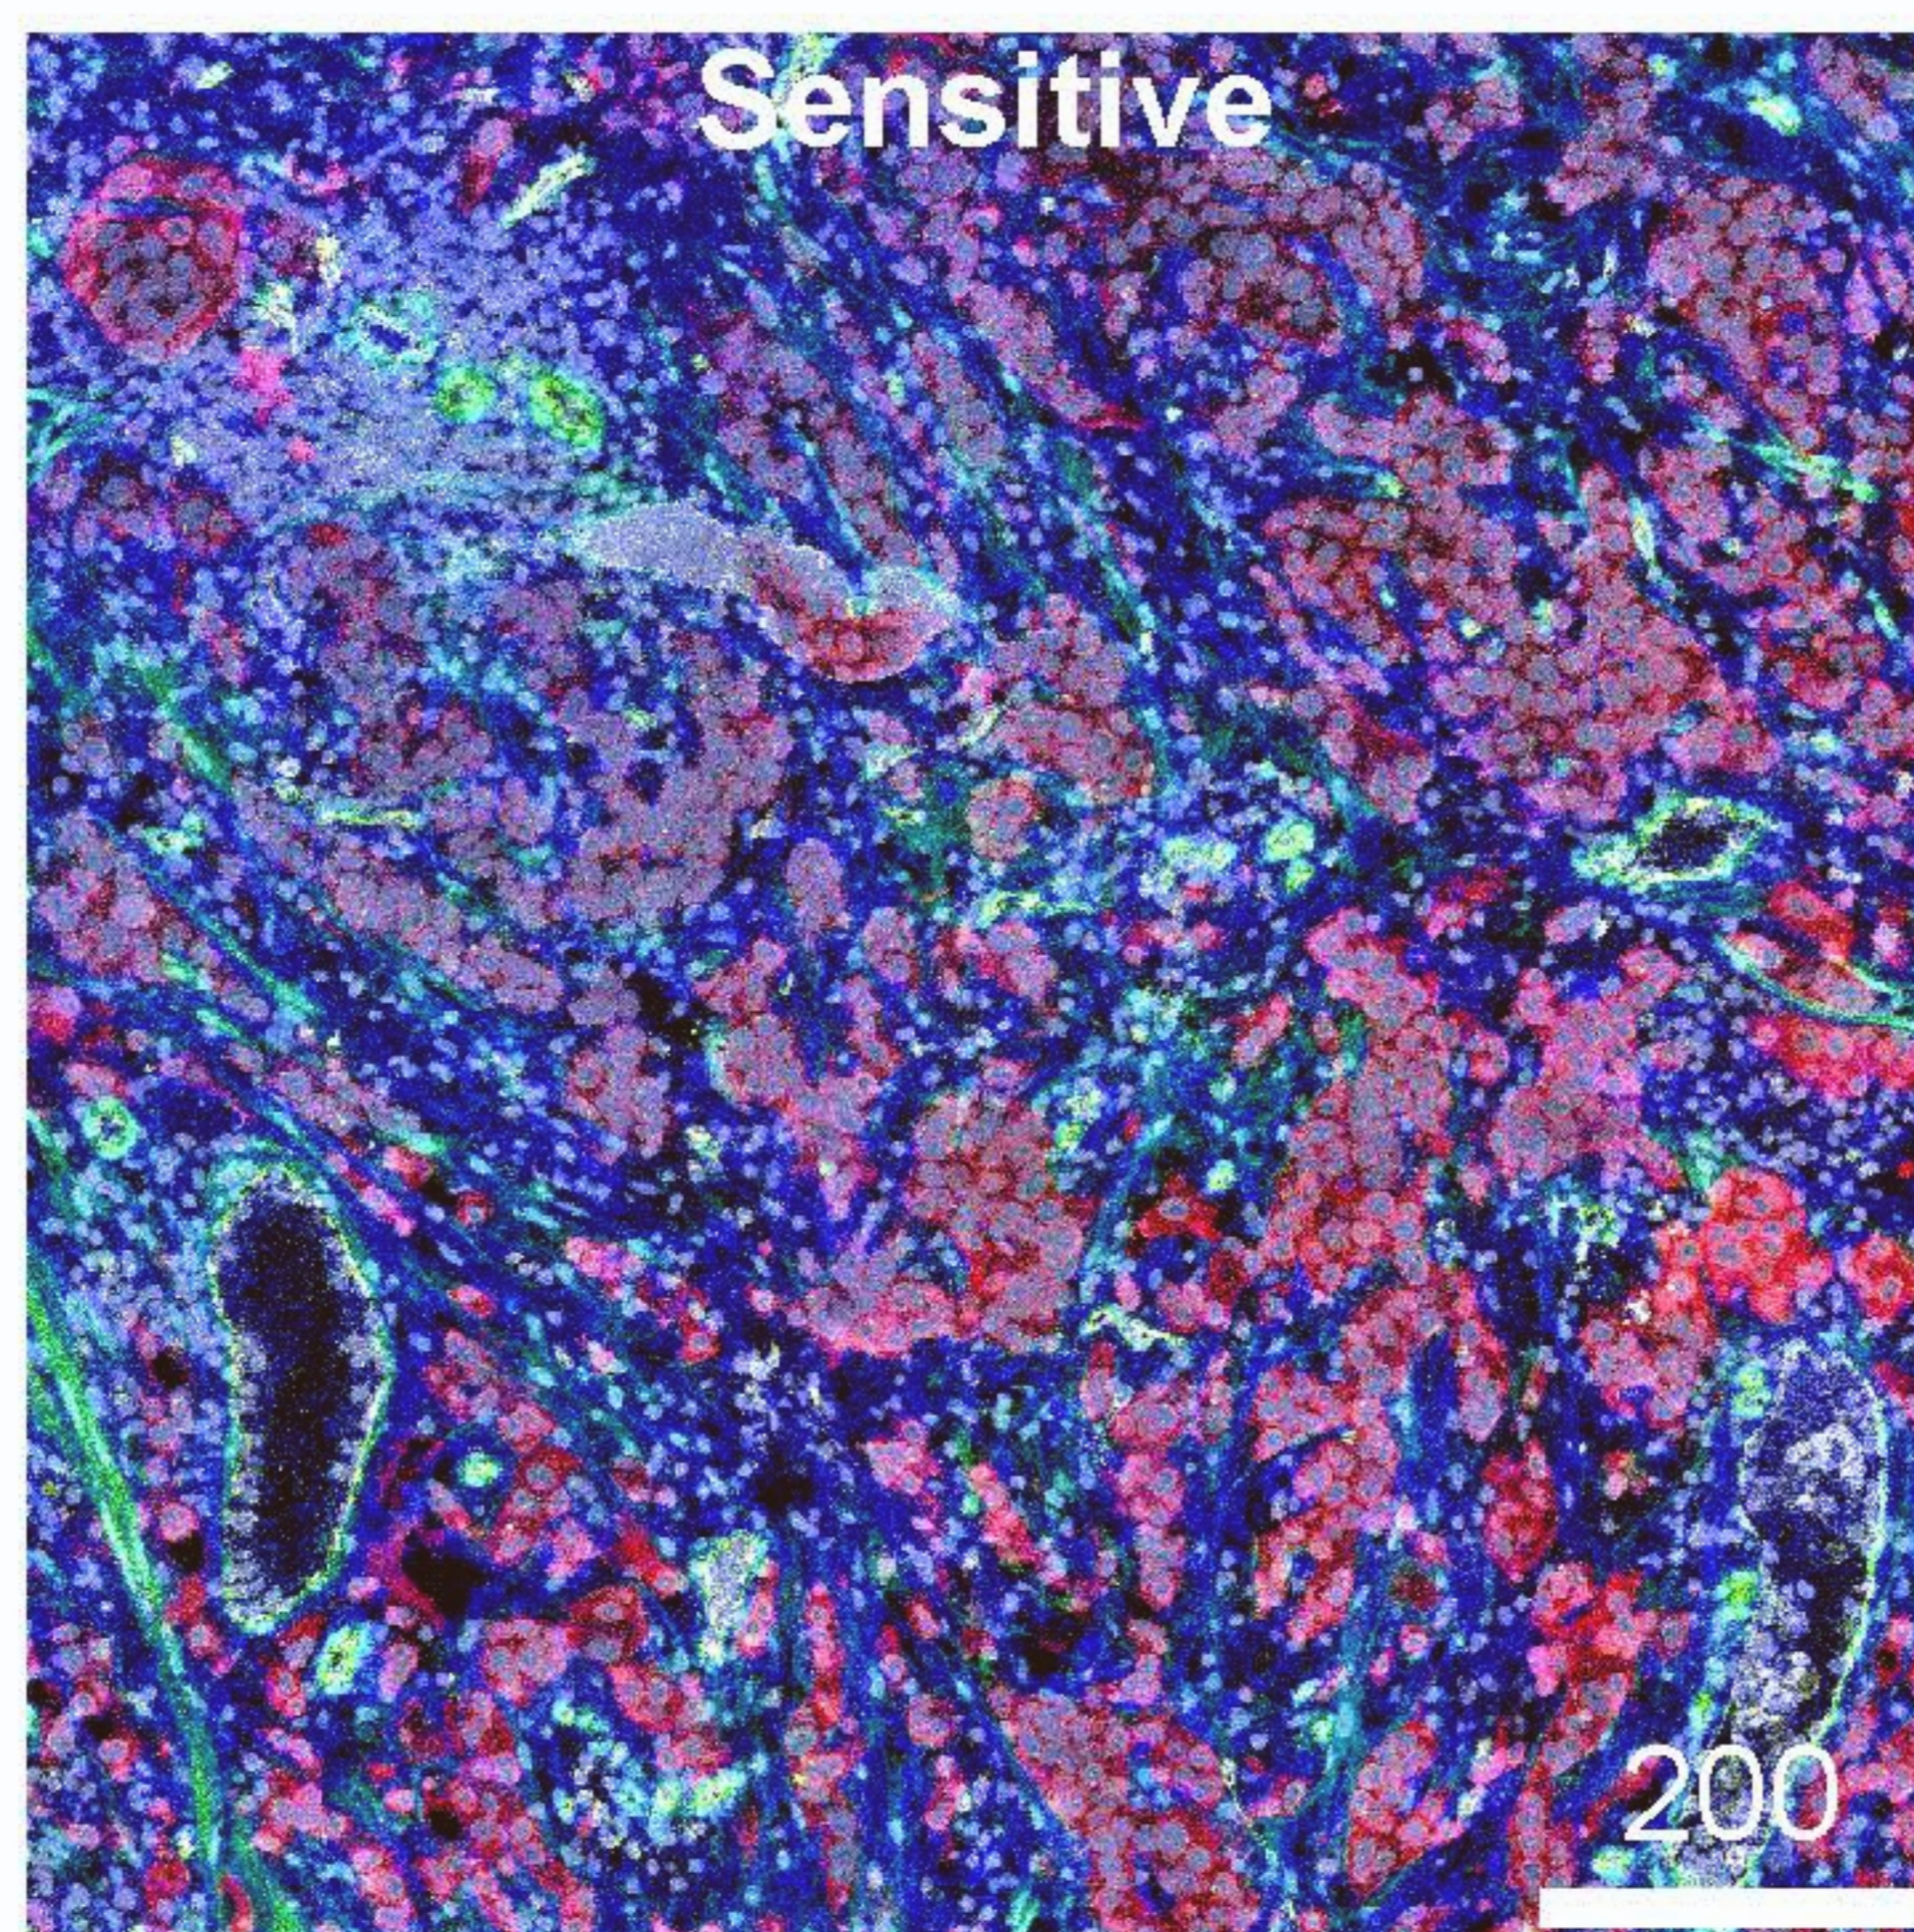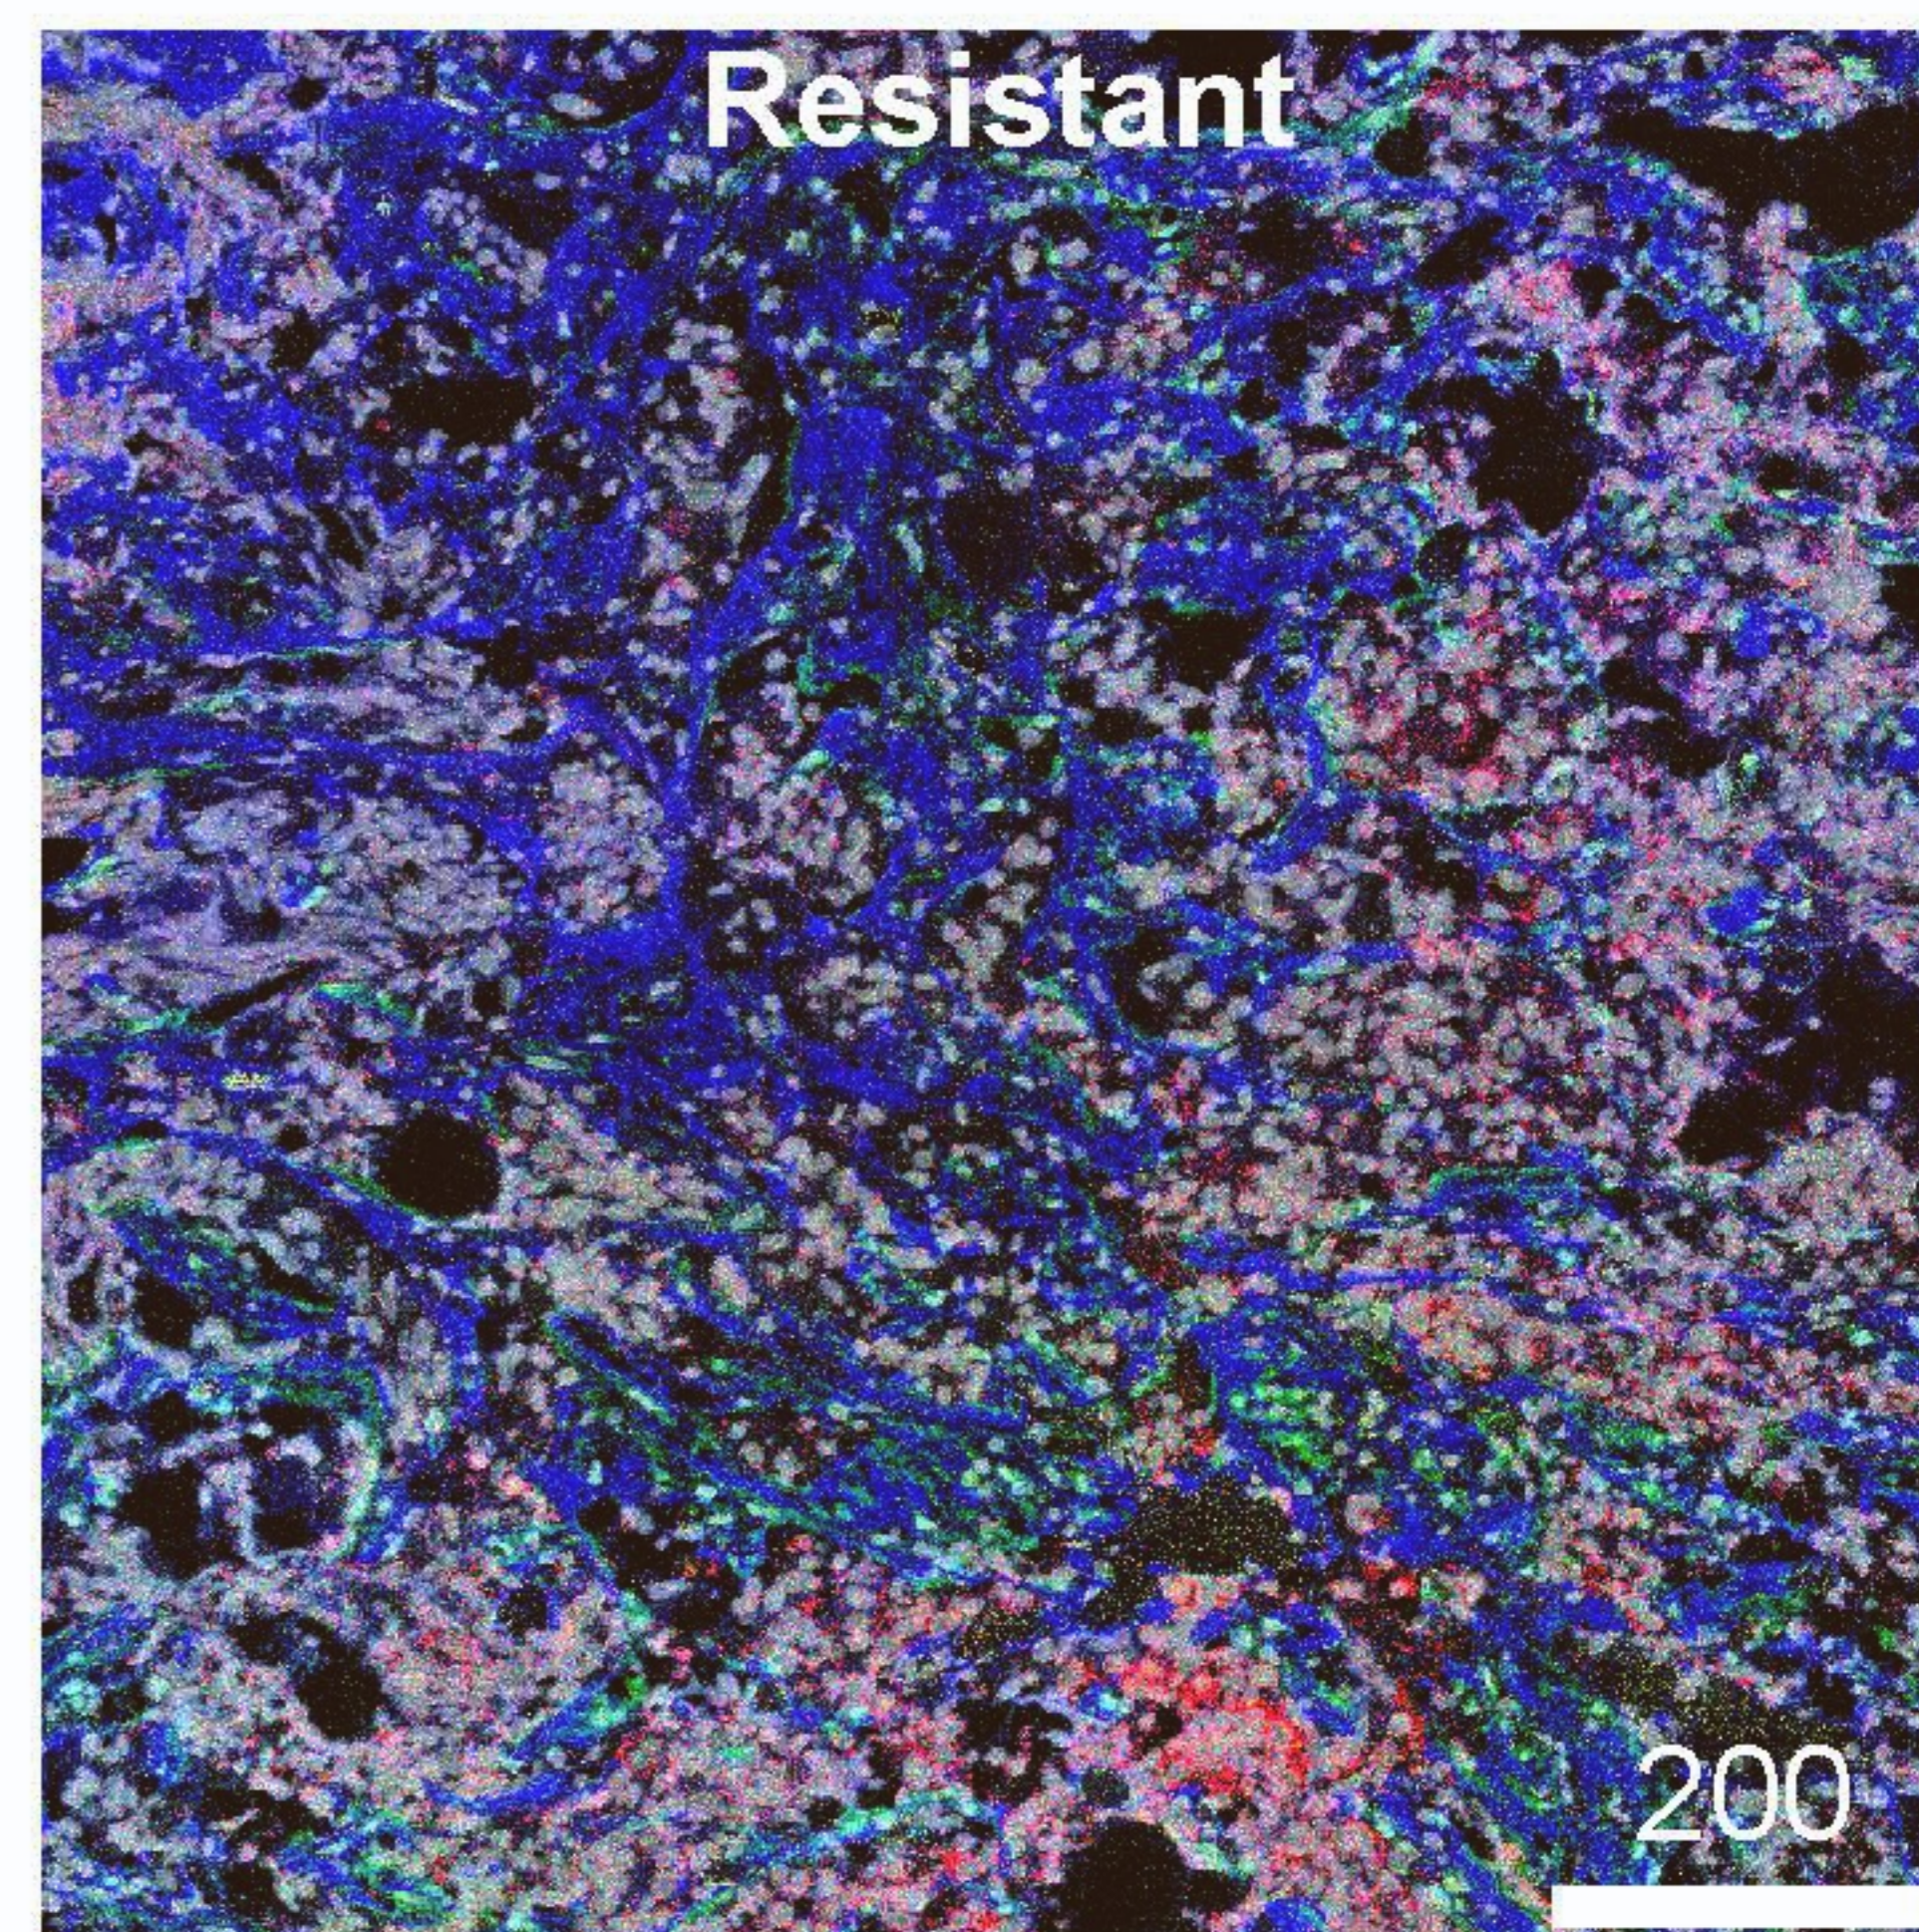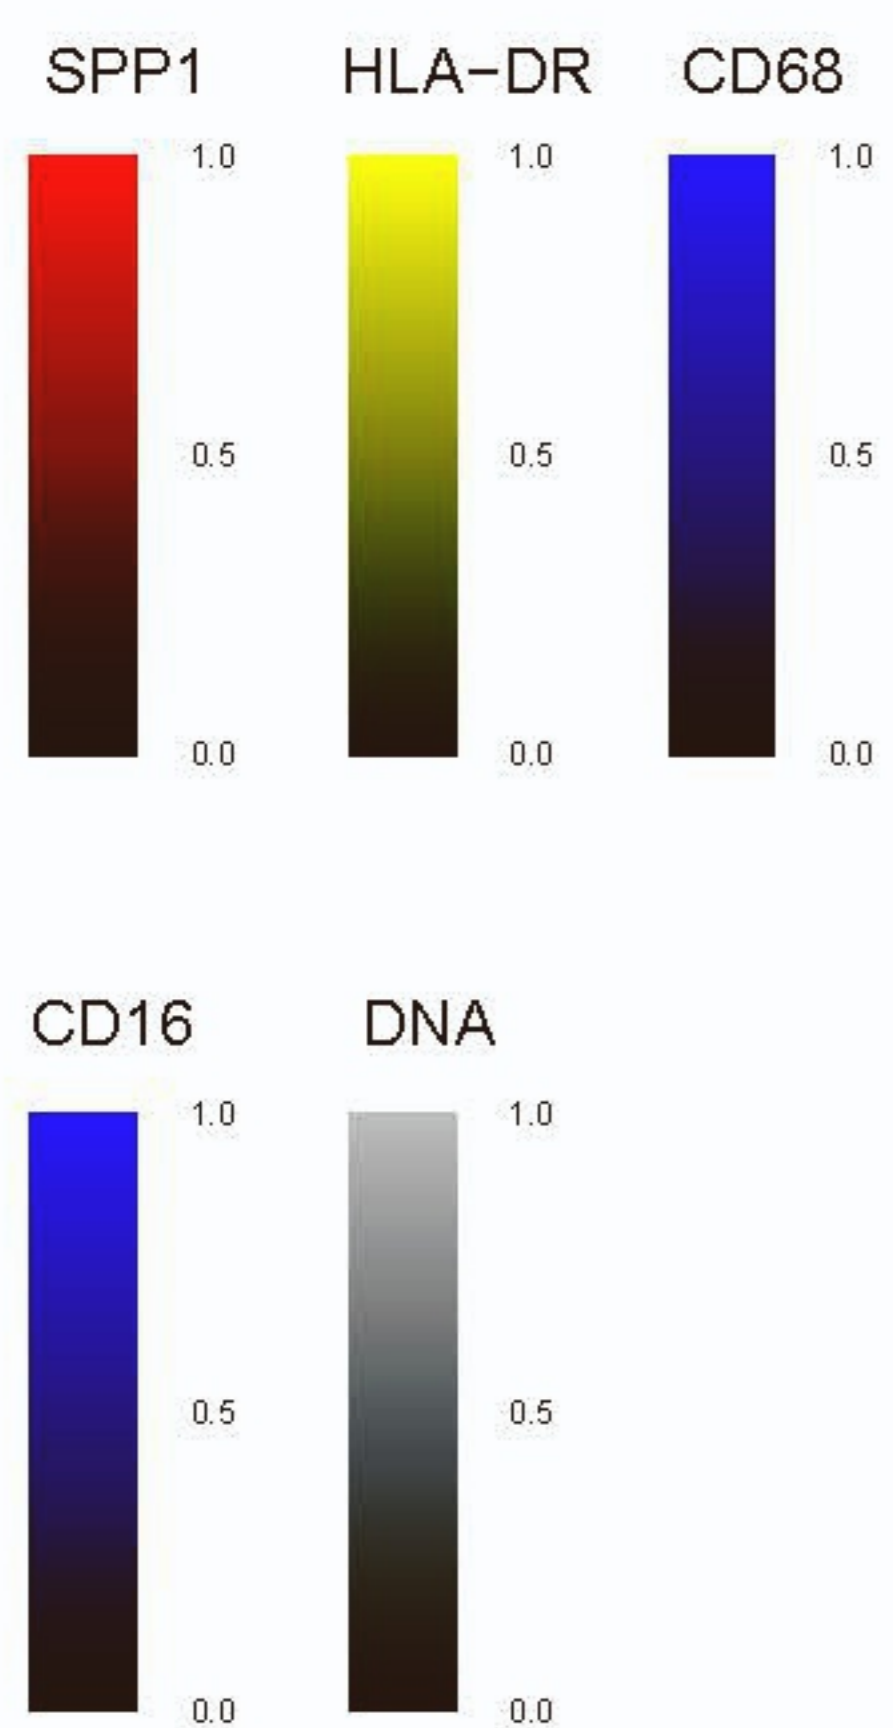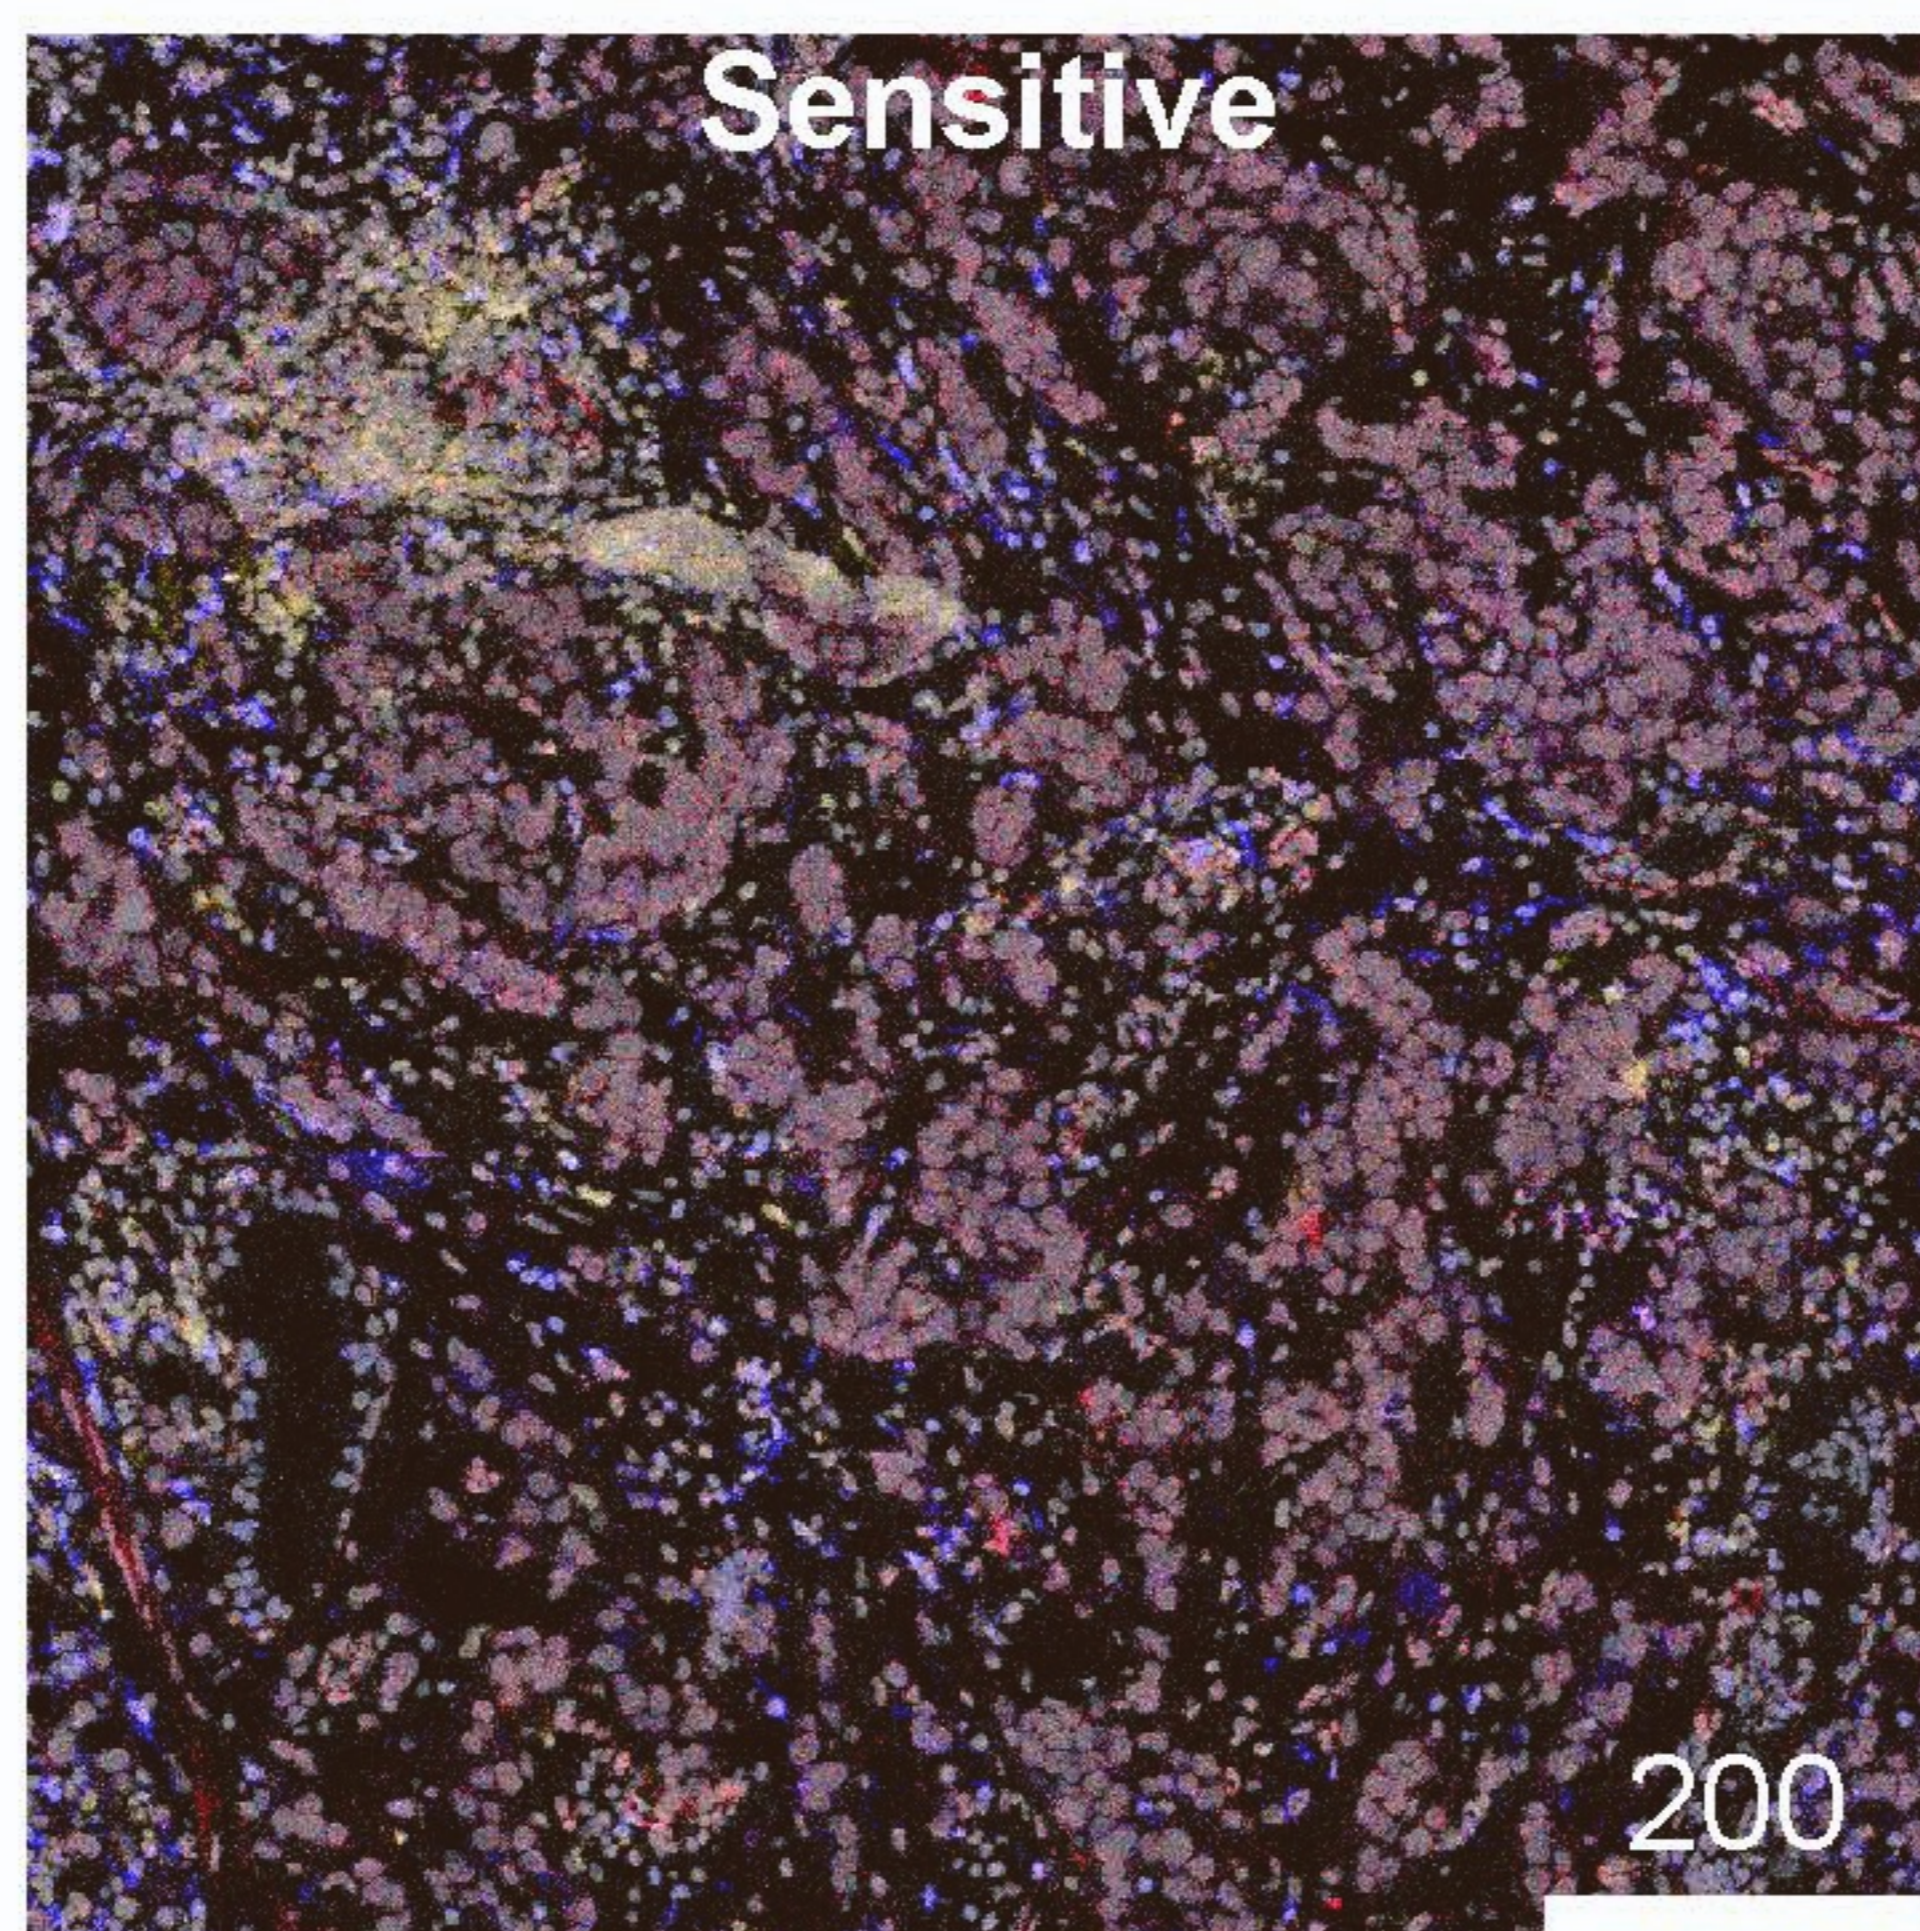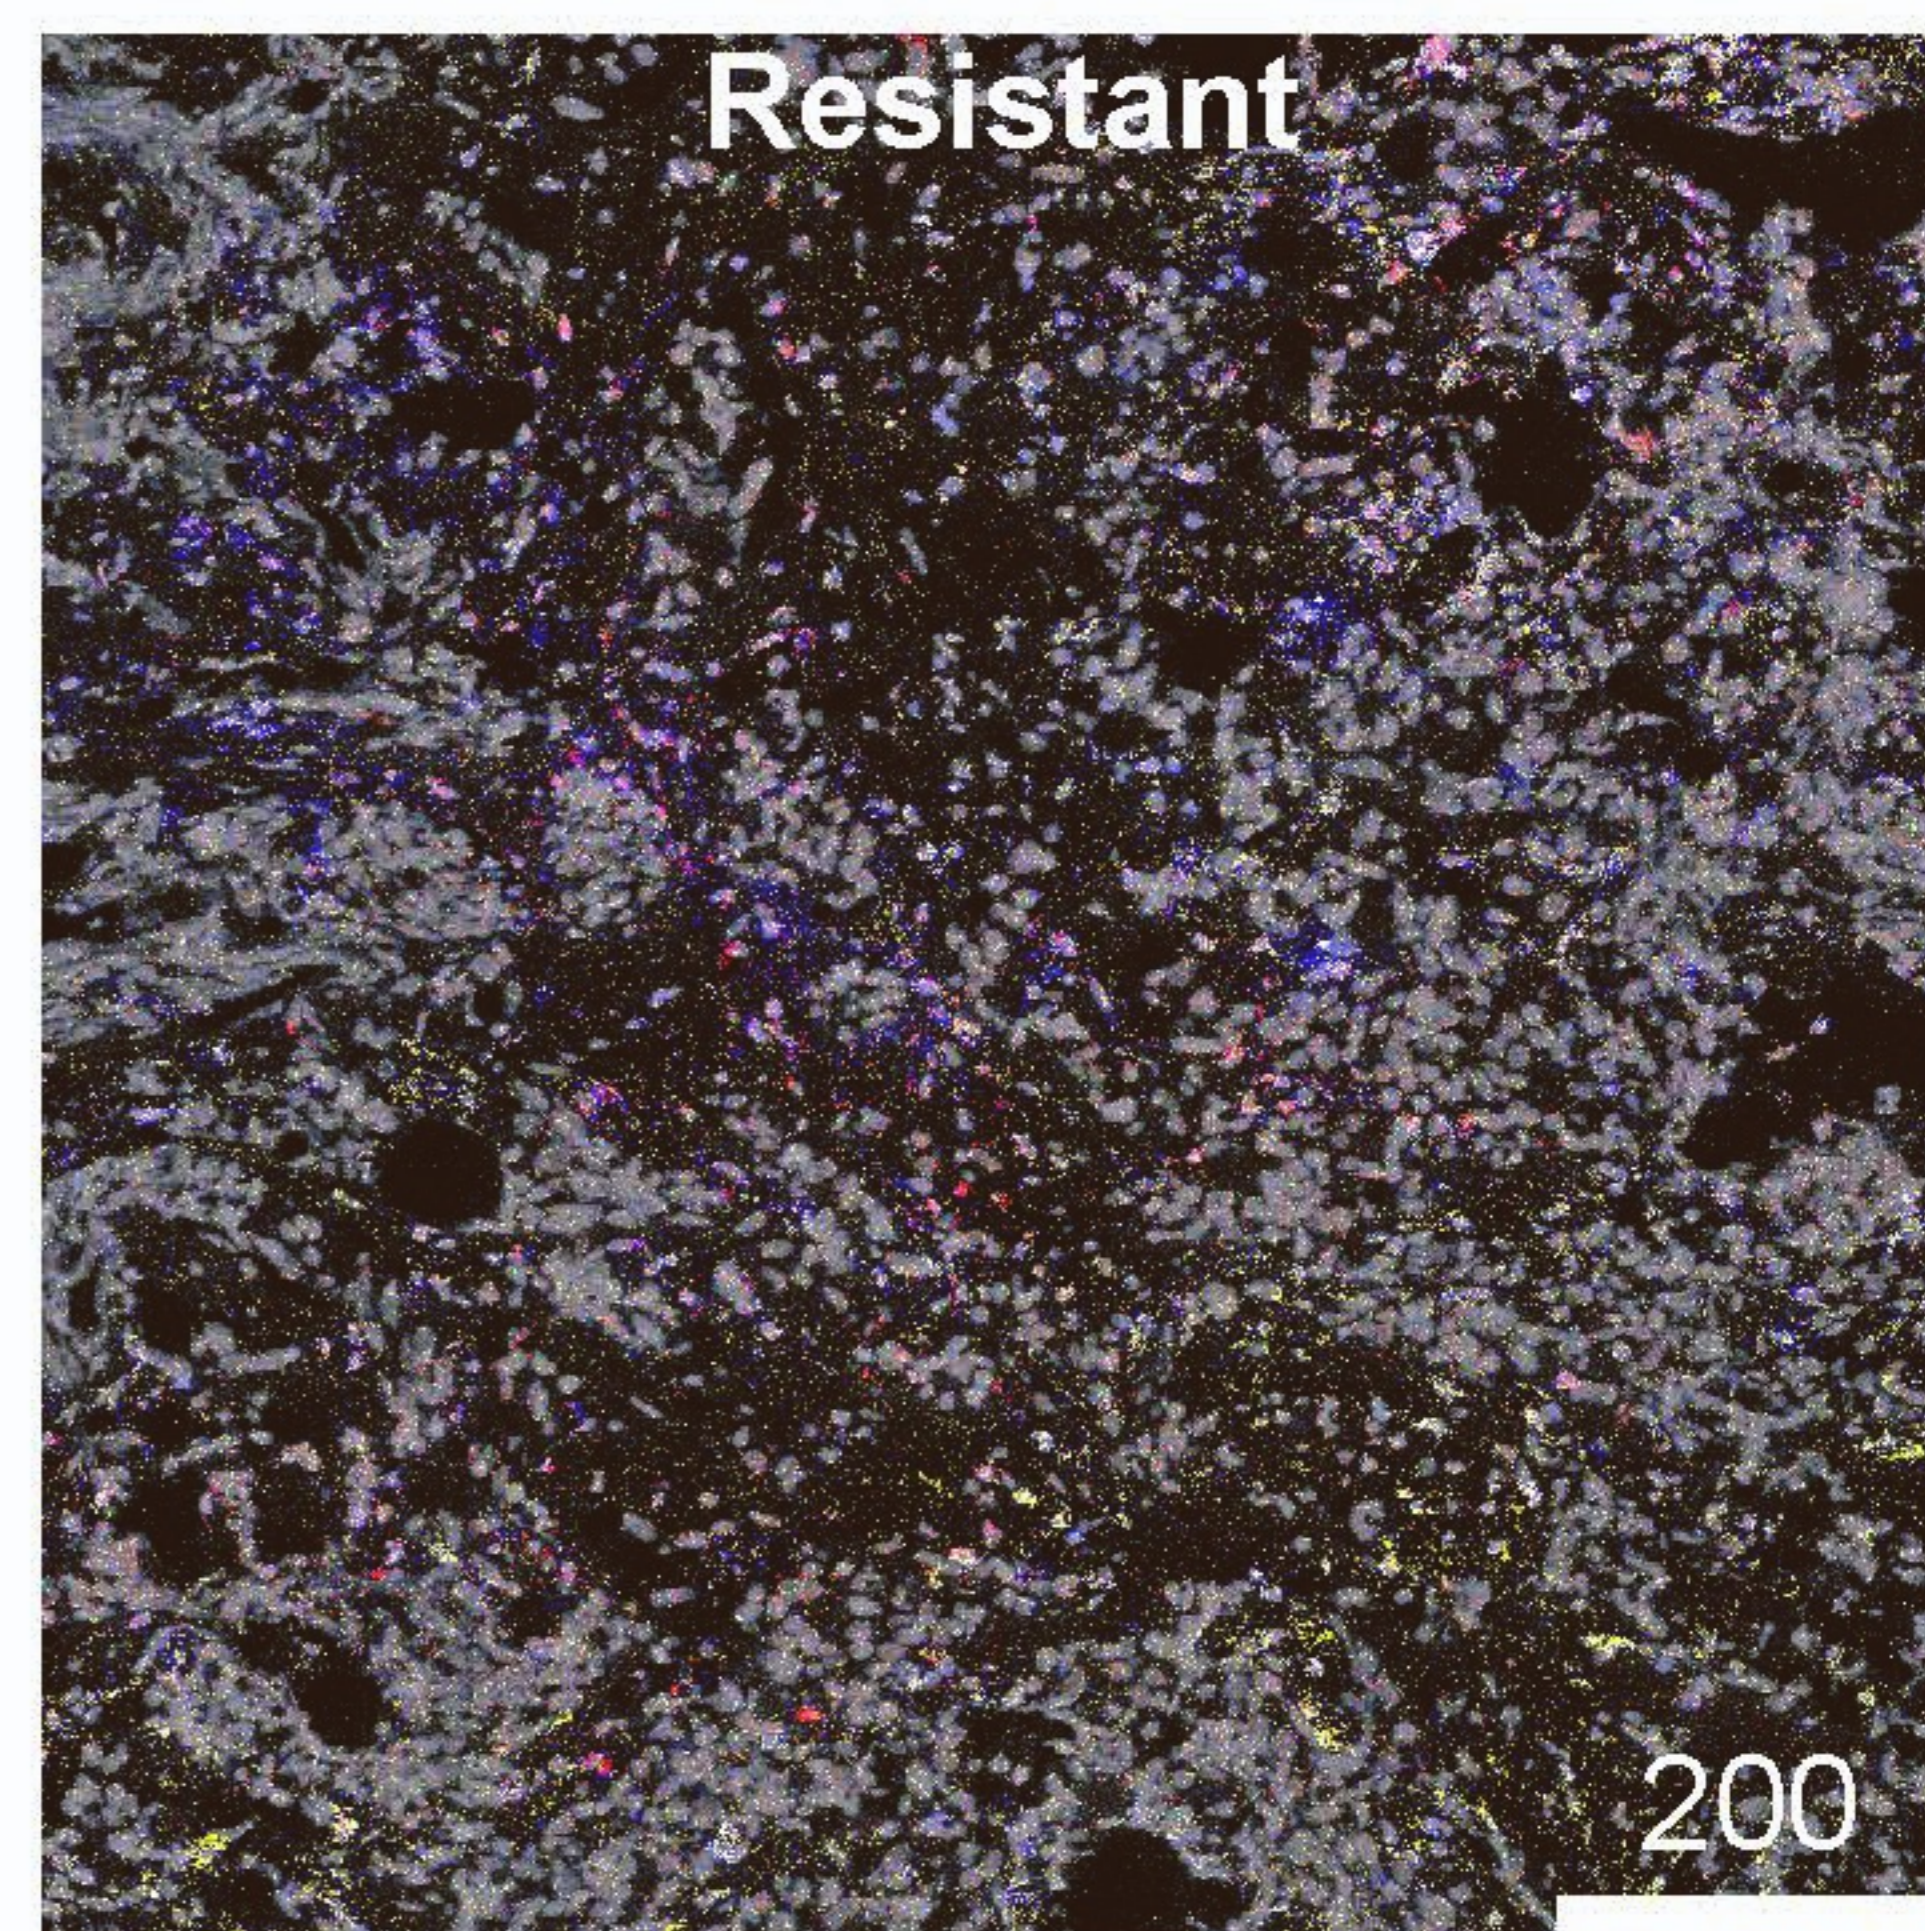

Figure S5

## Supplementary Figure Legends

**Figure S1 Integrative analysis of UC single cell cohort; related to Figure 1** (A) QC plots for each sample in UC single cell cohort (B) UMAP of all cells before removing “batch effects” colored by different sorting techniques used. (C) UMAP of all cells after removing “batch effects” colored by different sorting techniques used. (D) UMAP of all cells after removing “batch effects” colored by cell types and split by the various sorting techniques.

**Figure S2 Evaluation of ProM’s deconvolution performance; related to Figure 2** (A) Deconvolution accuracies of different algorithms using reconstituted bulk RNAseq profiles in UC. Y-axis indicates Mean Square Error (MSE) between deconvoluted and reconstituted cell frequency averaged across all the minor or major cell clusters. (B) Deconvolution accuracies when different numbers of cell markers were selected and different marker ranking strategies were employed in marker-based ProM deconvolution. (C) Deconvolution accuracies of ProM with and without cross-platform gene variation modeling. The x-axis represents different levels of cross-platform noise added to the reconstituted bulk profiles. (D) Deconvolution accuracies of different algorithms using reconstituted bulk RNAseq from pan cancer dataset. (E) Deconvolution accuracies of different deconvolution algorithms using paired single cell and bulk RNAseq data. The color in the heatmap represents the MSE between deconvoluted and observed frequency for particular cell subpopulations. The barplot above the heatmap indicates the average MSE across all cell subpopulations. (F) Scatter plot of ProM deconvoluted cell frequency from bulk RNAseq sample versus the observed cell frequency via matched scRNAseq sample for all 40 subpopulations.

**Figure S3 Heterogeneity of fibroblast subpopulations; related to Figure 3 and Figure 4** (A) The copy number variation (CNV) for each cell inferred from its scRNAseq profile using R package inferCNV (<http://github/broadinstitute/inferCNV>) for scRNAseq sample SI\_651 or the paired bulk sample 22144. The upper-panel is the inferred CNV for non-epithelial cells (immune and stromal cells), and the lower-panel is that for epithelial cells split into luminal and basal groups. (B) Mapping of Fibroblast-related cells in our scRNAseq cohort to fibroblast cell annotations in a pan-cancer scRNAseq study<sup>1</sup>. Colors in the heatmap represent the percentage of a certain cell subpopulation (x-axis) predicted as the other cell subpopulations (y-axis) by the SciBet model. (C) The relative frequency of the five fibroblast-subpopulations by ProM deconvolution averaged within each tumor subtype in four UC bulk RNAseq datasets. (D)(E) Kaplan-Meier (KM) curves of overall survival for TCGA BLCA samples grouped by the frequency of each fibroblast subpopulation among all cells (D) or by the relative frequency of each fibroblast subpopulation among all five fibroblast subpopulations (E). Three different cutoffs, i.e., the lower tertiary vs. the median and higher tertiary, were used to split patients into low and high cell frequency group. The cutoff resulting in the most significant p-value (log rank test) was shown here. The p-value of likelihood ratio test is 0.20, 0.05, 0.8, 0.019 (D) and 0.11, 0.21, 0.37, 0.79 (E), respectively, when cell frequency was treated as continuous variable in Cox-regression model.

**Figure S4 Survival Analysis of UC treated with PD-1/PD-L1 blockade; related to Figure 5.** (A) KM curves of overall survival for patients grouped by T-CD8\_GZMK and T-CD8\_reactive as estimated by ProM deconvolution in three PD-L1 clinical cohorts. (B) Using the same training datasets (IMvigor210 and CheckMate275) and the same criteria as in ProM analysis, the other nine deconvolution methods detected a total of five subpopulations significantly associated with overall survival (four by CibersortX\_batchB and one by MuSiC). None of the findings by CibersotX\_batchB and MuSiC can be replicated in the validation dataset (IMvigor010).

**Figure S5 Exploratory study of MM\_SPP1 using Imaging Mass Cytometry; related to Figure 5.** Visualization of pixel-level intensity of immune cell markers(upper), stromal cell markers(middle) and MM subpopulation markers(lower) within region of interest (ROI) from one patient sensitive (left) or resistant (right) to CPI.

## Supplementary Reference

1. Qian, J., Olbrecht, S., Boeckx, B., Vos, H., Laoui, D., Etliloglu, E., Wauters, E., Pomella, V., Verbandt, S., and Busschaert, P. (2020). A pan-cancer blueprint of the heterogeneous tumor microenvironment revealed by single-cell profiling. *Cell research* 30, 745-762.

### Supplementary Tables

**Table S1 samples in the paired single cell and bulk RNAseq cohort: related to Figure 1**

| Patient ID | scRNAseq  |               |                 |                               | Bulk RNAseq |
|------------|-----------|---------------|-----------------|-------------------------------|-------------|
|            | Sample ID | Cell sorting  | Specimen        | Published                     | Sample ID   |
| PI_21      | SI_357    | 10x_CD45_neg  | TURBT           | PMID: 32111252 PMID: 36129800 | 17760       |
| PI_22      | SI_359    | 10x_CD45_neg  | TURBT           | PMID: 32111252 PMID: 36129800 | 17766       |
| PI_7       | SI_454    | 10x_CD45_neg  | TURBT           | PMID: 36099881 PMID: 36129800 | 19639       |
| PI_8       | SI_457    | 10x_CD45_neg  | Cystectomy      | PMID: 36099881 PMID: 36129800 | 18418       |
| PI_21      | SI_358    | 10x_CD45_pos  | TURBT           | PMID: 36129800                | 17760       |
| PI_22      | SI_360    | 10x_CD45_pos  | TURBT           | PMID: 36129800                | 17766       |
| PI_1       | SI_385    | 10x_CD45_pos  | TURBT           | PMID: 36099881 PMID: 36129800 | 18763       |
| PI_2       | SI_394    | 10x_CD45_pos  | TURBT           | PMID: 36099881 PMID: 36129800 | NA          |
| PI_3       | SI_397    | 10x_CD45_pos  | TURBT           | PMID: 36099881 PMID: 36129800 | 18859       |
| PI_4       | SI_421    | 10x_CD45_pos  | TURBT           | PMID: 36099881 PMID: 36129800 | 19425       |
| PI_4       | SI_422    | 10x_tumor_NK  | TURBT           | NA                            | NA          |
| PI_4       | SI_423    | 10x_tumor_CD8 | TURBT           | NA                            | NA          |
| PI_4       | SI_424    | 10x_tumor_CD4 | TURBT           | NA                            | NA          |
| PI_5       | SI_434    | 10x_CD45_pos  | TURBT           | PMID: 36099881 PMID: 36129800 | 16877       |
| PI_6       | SI_435    | 10x_CD45_pos  | Cystectomy      | PMID: 36099881 PMID: 36129800 | NA          |
| PI_7       | SI_453    | 10x_CD45_pos  | TURBT           | PMID: 36099881 PMID: 36129800 | 19639       |
| PI_8       | SI_456    | 10x_CD45_pos  | Cystectomy      | PMID: 36099881 PMID: 36129800 | 18418       |
| PI_15      | SI_584    | 10x_unsorted  | Cystectomy      | PMID: 33837006 PMID: 36099881 | NA          |
| PI_15      | SI_585    | 10x_unsorted  | Adjacent Normal | PMID: 33837006                | NA          |
| PI_9       | SI_595    | 10x_unsorted  | Cystectomy      | PMID: 33837006 PMID: 36099881 | NA          |
| PI_9       | SI_596    | 10x_unsorted  | Adjacent Normal | PMID: 33837006                | NA          |
| PI_14      | SI_603    | 10x_unsorted  | TURBT           | PMID: 33837006                | 21753       |
| PI_17      | SI_604    | 10x_unsorted  | TURBT           | PMID: 33837006                | 21783       |



|       |        |              |            |                               |       |
|-------|--------|--------------|------------|-------------------------------|-------|
| PI_18 | SI_613 | 10x_unsorted | TURBT      | PMID: 33837006 PMID: 36099881 | NA    |
| PI_14 | SI_651 | 10x_unsorted | Cystectomy | PMID: 33837006 PMID: 36099881 | 22144 |
| PI_23 | SI_656 | 10x_unsorted | Cystectomy | PMID: 33837006 PMID: 36099881 | 22171 |
| PI_16 | SI_659 | 10x_unsorted | Cystectomy | NA                            | NA    |
| PI_24 | SI_695 | 10x_unsorted | TURBT      | PMID: 33837006 PMID: 36099881 | 22605 |
| PI_25 | SI_696 | 10x_mixed    | TURBT      | NA                            | NA    |
| PI_26 | SI_697 | 10x_mixed    | Lymph Node | NA                            | 22612 |

**Table S2 Patient clinical information: related to Figure 1**

| Patient ID | Gender | Age   | Stage    | Race         |
|------------|--------|-------|----------|--------------|
| PI_1       | M      | 50-60 | cT2N0M0  | White        |
| PI_2       | M      | 70-80 | cT0N0M0  | White        |
| PI_3       | M      | 60-70 | cT3N0M0  | White        |
| PI_4       | F      | 80-90 | cTaN0M0  | White        |
| PI_5       | M      | 60-70 | pT4bN3M0 | White        |
| PI_6       | M      | 80-90 | pT3bN0M0 | White        |
| PI_7       | M      | 80-90 | cT2N0M0  | White        |
| PI_8       | M      | 60-70 | yT4N2M0  | Asian.Indian |
| PI_9       | M      | 70-80 | pT2N0M0  | White        |
| PI_14      | F      | 40-50 | cT2N0M0  | Asian        |
| PI_15      | M      | 60-70 | pT4N0M0  | White        |
| PI_16      | M      | 60-70 | pT0N0M0  | White        |
| PI_17      | F      | 70-80 | cT2N0M0  | White        |
| PI_18      | F      | 80-90 | cT3N0M0  | White        |
| PI_21      | F      | 80-90 | cT2N0M0  | White        |
| PI_22      | M      | 50-60 | cT2N0M0  | White        |
| PI_23      | M      | 70-80 | pT3bN2M0 | White        |
| PI_24      | M      | 60-70 | cT2N0M0  | White        |
| PI_25      | F      | 70-80 | pT0N0M0  | Unknown      |
| PI_26      | M      | 60-70 | pT3aN2M0 | White        |

**Table S3 Comparison between ProM and other deconvolution methods; related to Figure 2**

| Comparison with ProM | Reconstituted bulk: CD45-sorted<br>Reference scRNAseq: unsorted |          |               |         | Reconstituted bulk: unsorted<br>Reference scRNAseq: CD45-sorted |         |               |         | Paired scRNAseq<br>and bulk RNAseq |         | TCGA<br>(by Methylation) |         |
|----------------------|-----------------------------------------------------------------|----------|---------------|---------|-----------------------------------------------------------------|---------|---------------|---------|------------------------------------|---------|--------------------------|---------|
|                      | Minor cluster                                                   |          | Major cluster |         | Minor cluster                                                   |         | Major cluster |         | Minor cluster                      |         | Major cluster            |         |
|                      | t-stat*                                                         | p-value* | t-stat        | p-value | t-stat                                                          | p-value | t-stat        | p-value | t-stat                             | p-value | t-stat                   | p-value |
| ProM_profileOnly     | 2.41                                                            | 1.0E-02  | 0.87          | 2.0E-01 | 1.48                                                            | 7.3E-02 | 1.08          | 1.5E-01 | 4.25                               | 6.4E-05 | 2.36                     | 2.8E-02 |
| ProM_markerOnly      | 2.72                                                            | 4.8E-03  | 2.08          | 2.9E-02 | 2.50                                                            | 8.4E-03 | 2.93          | 5.8E-03 | 0.26                               | 4.0E-01 | 2.87                     | 1.4E-02 |
| CibersortX_batchB    | 4.58                                                            | 2.3E-05  | 2.48          | 1.4E-02 | 3.34                                                            | 9.2E-04 | 3.95          | 8.3E-04 | 2.41                               | 1.0E-02 | 2.59                     | 2.1E-02 |
| CibersortX           | 4.85                                                            | 1.0E-05  | 2.90          | 6.2E-03 | 4.01                                                            | 1.3E-04 | 3.01          | 5.0E-03 | 2.36                               | 1.2E-02 | 2.91                     | 1.3E-02 |
| BayesPrism           | 3.89                                                            | 1.9E-04  | 3.17          | 3.7E-03 | 3.61                                                            | 4.3E-04 | 2.75          | 8.2E-03 | 4.54                               | 2.7E-05 | 3.18                     | 9.6E-03 |
| MuSiC                | 5.59                                                            | 9.7E-07  | 2.98          | 5.3E-03 | 5.67                                                            | 7.5E-07 | 3.10          | 4.2E-03 | 4.91                               | 8.4E-06 | 2.90                     | 1.4E-02 |
| CibersortX_batchS    | 7.09                                                            | 8.1E-09  | 3.00          | 5.1E-03 | 7.31                                                            | 4.0E-09 | 4.30          | 4.3E-04 | 5.54                               | 1.1E-06 | 4.61                     | 1.8E-03 |
| BisqueRNA            | 8.92                                                            | 3.0E-11  | 3.91          | 9.0E-04 | 6.85                                                            | 1.7E-08 | 4.99          | 1.2E-04 | 5.25                               | 2.9E-06 | 3.37                     | 7.5E-03 |
| DeconRNASeq          | 9.11                                                            | 1.7E-11  | 3.93          | 8.7E-04 | 8.82                                                            | 3.9E-11 | 7.46          | 2.4E-06 | 6.36                               | 8.3E-08 | 4.32                     | 2.5E-03 |
| npls                 | 10.65                                                           | 2.1E-13  | 4.45          | 3.3E-04 | 8.82                                                            | 4.0E-11 | 8.05          | 1.0E-06 | 5.96                               | 3.0E-07 | 4.27                     | 2.6E-03 |
| DSA                  | 12.27                                                           | 2.9E-15  | 4.90          | 1.4E-04 | 8.36                                                            | 1.6E-10 | 12.50         | 6.4E-09 | 8.31                               | 1.8E-10 | 4.82                     | 1.5E-03 |

\*Pearson's correlation coefficient (PCC) between deconvolution results and "ground truth" was calculated for each cell subpopulation (40 minor cell clusters and 15 major clusters). Paired t-test was conducted to compare the difference of PCC between ProM and the other method across all cell subpopulations (sample size = 40 for minor cluster and 15 for major cluster). The t-statistic and one-sided p-value was shown in the table.
